# Supplementary material for: Nonlinear structure-extended cavity interaction simulation using a new version of harmonic balance method
Source: PLoS One. 2018 Jul 3;13(7):e0199159. doi: 10.1371/journal.pone.0199159 (PMC6029766; doi:10.1371/journal.pone.0199159)
Supplement: S1 File — (XLSX) [file pone.0199159.s001.xlsx]

## Sheet: Data 1
		No. of equations				Time required (sec)			Time required (sec)
		1				0.33			0.33
		2				1.17			0.74
		3				2.03			1.14
		4				2.88			1.56
		5				3.78			1.96
		6				4.7			2.35
		7				5.1			2.75
		8				5.99			3.08
		9				7.03			3.47
		10				8.15			3.88

## Sheet: Data2a
					1st level New Resid HB solution																														1st level New Resid HB solution
																2 term Class HB solution									1st level Old Resid HB solution
			Amplitude Ratio							Amplitude Ratio																							Amplitude Ratio
							Amplitude Ratio																														Amplitude Ratio
																	Amplitude Ratio								Amplitude Ratio
0.2			0.2139											0.2		0.21397	0.00441363		0.214016			0.2				0.214	0.214			0.2
0.21			0.2147											0.21								0.21					0.215			0.21
0.22			0.2156											0.22								0.22					0.216			0.22
0.23			0.2165											0.23								0.23					0.217			0.23
0.24			0.2174											0.24								0.24					0.218			0.24
0.25			0.2184											0.25								0.25					0.219			0.25
0.26			0.2195											0.26								0.26					0.22			0.26
0.27			0.2206											0.27								0.27					0.221			0.27
0.28			0.2218											0.28								0.28					0.222			0.28
0.29			0.223											0.29								0.29					0.223			0.29
0.3			0.2243											0.3		0.2245	0.01285		0.224867			0.3				0.225	0.225			0.3
0.31			0.2258											0.31								0.31					0.227			0.31
0.32			0.2274											0.32								0.32					0.229			0.32
0.33			0.2293											0.33								0.33					0.232			0.33
0.34			0.2328											0.34								0.34				1.2	0.242			0.34
0.35			0.2456	0.2456										0.35								0.35				2.5	20.754			0.35				0.3
0.36			0.239	0.3241										0.36		0.2082	0.30297		0.367611			0.36				0.5	0.239			0.36			0.2235	0.4925
0.37			0.2349	0.4241										0.37								0.37					0.235			0.37			0.1236	0.5904
0.38			0.2359	0.5018										0.38								0.38					0.236			0.38			0.08624	0.636
0.39			0.2375	0.5696										0.39								0.39					0.237			0.39			0.06633	0.6651
0.4			0.2393	0.6311										0.4		0.2388	-0.01369		0.239192			0.4				0.239	0.239			0.4			0.05395	0.6859
0.41			0.2412	0.6882										0.41		0.12438	0.69967		0.710639			0.41					0.241			0.41			0.04554	0.7018
0.42			0.2432	0.7421										0.42								0.42					0.243			0.42			0.03945	0.7144
0.43			0.2453	0.7934										0.43								0.43					0.245			0.43			0.03485	0.7247
0.44			0.2475	0.8425										0.44								0.44					0.247			0.44			0.03126	0.7332
0.45			0.2497	0.89										0.45								0.45					0.25			0.45			0.02838	0.7403
0.46			0.2521	0.936										0.46		0.08613	0.94949		0.953389			0.46					0.252			0.46			0.02604	0.7463
0.47			0.2545	0.9808										0.47								0.47					0.255			0.47			0.02409	0.7513
0.48			0.257	1.024										0.48								0.48					0.257			0.48			0.02245	0.7557
0.49			0.2596	1.067										0.49								0.49					0.26			0.49			0.02106	0.7593
0.5			0.2623	1.109										0.5		0.26228	-0.00532866		0.262334			0.5				0.262	0.262			0.5			0.01986	0.7625
0.51			0.2652	1.15										0.51		0.06442	1.16193		1.16371			0.51					0.265			0.51			0.01882	0.7651
0.52			0.2681	1.191										0.52								0.52					0.268			0.52			0.01792	0.7672
0.53			0.2711	1.231										0.53								0.53					0.271			0.53			0.01713	0.769
0.54			0.2742	1.27										0.54								0.54					0.274			0.54			0.01644	0.7704
0.55			0.2774	1.309										0.55								0.55					0.277			0.55			0.01583	0.7715
0.56			0.2808	1.348										0.56		0.05049	1.35683		1.35777			0.56					0.281			0.56			0.01528	0.7722
0.57			0.2843	1.386										0.57								0.57					0.284			0.57			0.0148	0.7727
0.58			0.2879	1.424										0.58								0.58					0.288			0.58			0.01438	0.7729
0.59			0.2916	1.461										0.59								0.59					0.292			0.59			0.014	0.7728
0.6			0.2955	1.498										0.6		0.29543	-0.00410372		0.295459			0.6				0.295	0.295			0.6			0.01367	0.7725
0.61			0.2995	1.535										0.61		0.04087	1.54145		1.54199			0.61					0.299			0.61			0.01337	0.7719
0.62			0.3036	1.572										0.62								0.62					0.304			0.62			0.01311	0.7711
0.63			0.3079	1.608										0.63								0.63					0.308			0.63			0.01288	0.7701
0.64			0.3124	1.644										0.64								0.64					0.312			0.64			0.01268	0.7689
0.65			0.317	1.68										0.65								0.65					0.317			0.65			0.0125	0.7674
0.66			0.3218	1.716										0.66		0.03387	1.71931		1.71964			0.66					0.322			0.66			0.01235	0.7658
0.67			0.3267	1.751										0.67								0.67					0.327			0.67			0.01222	0.7639
0.68			0.3318	1.786										0.68								0.68					0.332			0.68			0.01212	0.7619
0.69			0.3371	1.821										0.69								0.69					0.337			0.69			0.01203	0.7597
0.7			0.3426	1.856										0.7		0.34258	-0.0041625		0.342605			0.7				0.343	0.343			0.7			0.01197	0.7573
0.71			0.3483	1.891										0.71		0.0286	1.8924		1.89262			0.71					0.348			0.71			0.01192	0.7547
0.72			0.3541	1.925										0.72								0.72					0.354			0.72			0.01189	0.752
0.73			0.3602	1.96										0.73								0.73					0.36			0.73			0.01187	0.7491
0.74			0.3664	1.994										0.74								0.74					0.366			0.74			0.01187	0.7461
0.75			0.3729	2.028										0.75								0.75					0.373			0.75			0.01189	0.7429
0.76			0.3795	2.062										0.76		0.02451	2.06196		2.06211			0.76					0.38			0.76			0.01191	0.7395
0.77			0.3864	2.096										0.77								0.77					0.386			0.77			0.01196	0.736
0.78			0.3934	2.129										0.78								0.78					0.393			0.78			0.01201	0.7324
0.79			0.4007	2.163										0.79								0.79					0.401			0.79			0.01208	0.7287
0.8			0.4082	2.196										0.8		0.40814	-0.00504882		0.408171			0.8				0.408	0.408			0.8			0.01216	0.7249
0.81			0.4159	2.229										0.81		0.02127	2.22882		2.22892			0.81					0.416			0.81			0.01226	0.721
0.82			0.4238	2.262										0.82								0.82					0.424			0.82			0.01236	0.7171
0.83			0.4319	2.294										0.83								0.83					0.432			0.83			0.01248	0.713
0.84			0.4402	2.327										0.84								0.84					0.44			0.84			0.0126	0.7089
0.85			0.4488	2.359										0.85								0.85					0.449			0.85			0.01274	0.7048
0.86			0.4575	2.392										0.86								0.86					0.458			0.86			0.01289	0.7007
0.87			0.4665	2.424										0.87		0.01818	2.42629		2.42636			0.87					0.466			0.87			0.01304	0.6965
0.88			0.4756	2.455										0.88								0.88					0.476			0.88			0.01321	0.6923
0.89			0.4849	2.487										0.89								0.89					0.485			0.89			0.01338	0.6882
0.9			0.4944	2.519										0.9		0.49436	-0.00684583		0.494407			0.9				0.494	0.494			0.9			0.01356	0.684
0.91			0.5041	2.55										0.91								0.91					0.504			0.91			0.01375	0.68
0.92			0.514	2.581										0.92								0.92					0.514			0.92			0.01395	0.6759
0.93			0.5241	2.613										0.93		0.01573	2.62138		2.62143			0.93					0.524			0.93			0.01415	0.6719
0.94			0.5343	2.644										0.94								0.94					0.534			0.94			0.01436	0.668
0.95			0.5446	2.675										0.95								0.95					0.545			0.95			0.01458	0.6641
0.96			0.5551	2.705										0.96								0.96					0.555			0.96			0.0148	0.6604
0.97			0.5657	2.736										0.97								0.97					0.566			0.97			0.01503	0.6567
0.98			0.5765	2.767										0.98		0.01406	2.78252		2.78256			0.98					0.577			0.98			0.01526	0.6531
0.99			0.5874	2.797										0.99								0.99					0.587			0.99			0.01549	0.6496
1			0.5984	2.828										1		0.59825	-0.00966061		0.598328			1				0.598	0.598			1			0.01573	0.6462
1.01			0.6095	2.858										1.01								1.01					0.61			1.01			0.01597	0.6429
1.02			0.6207	2.889										1.02								1.02					0.621			1.02			0.01621	0.6397
1.03			0.632	2.919										1.03		0.01264	2.94257		2.9426			1.03					0.632			1.03			0.01646	0.6366
1.04			0.6434	2.949										1.04								1.04					0.643			1.04			0.01671	0.6336
1.05			0.6549	2.98										1.05		0.01214	3.00633		3.00635			1.05					0.655			1.05			0.01696	0.6307
1.06			0.6664	3.01										1.06								1.06					0.666			1.06			0.01721	0.6279
1.07			0.678	3.04										1.07								1.07					0.678			1.07			0.01746	0.6253
1.08			0.6897	3.07										1.08								1.08					0.69			1.08			0.01771	0.6227
1.09			0.7014	3.101										1.09								1.09					0.701			1.09			0.01797	0.6202
1.1			0.7131	3.131										1.1		0.71286	-0.01341		0.712986			1.1				0.713	0.713			1.1			0.01822	0.6178
1.11			0.7249	3.161										1.11		0.01079	3.19681		3.19683			1.11					0.725			1.11			0.01847	0.6155
1.12			0.7368	3.191										1.12								1.12					0.737			1.12			0.01872	0.6133
1.13			0.7486	3.222										1.13								1.13					0.749			1.13			0.01897	0.6112
1.14			0.7605	3.252										1.14								1.14					0.761			1.14			0.01922	0.6092
1.15			0.7725	3.282										1.15								1.15					0.772			1.15			0.01947	0.6072
1.16			0.7844	3.312										1.16								1.16					0.784			1.16			0.01972	0.6054
1.17			0.7963	3.343										1.17								1.17					0.796			1.17			0.01996	0.6036
1.18			0.8083	3.373										1.18		0.0094925	3.41776		3.41777			1.18					0.808			1.18			0.02021	0.6018
1.19			0.8203	3.403										1.19								1.19					0.82			1.19			0.02045	0.6002
1.2			0.8323	3.433										1.2		0.83181	-0.01788		0.832002			1.2				0.832	0.832			1.2			0.02069	0.5986
1.21			0.8442	3.464										1.21								1.21					0.844			1.21			0.02092	0.5971
1.22			0.8562	3.494										1.22								1.22					0.856			1.22			0.02116	0.5956
1.23			0.8682	3.524										1.23								1.23					0.868			1.23			0.02139	0.5942
1.24			0.8802	3.555										1.24								1.24					0.88			1.24			0.02162	0.5928
1.25			0.8922	3.585										1.25		0.00841671	3.63757		3.63758			1.25					0.892			1.25			0.02185	0.5915
1.26			0.9042	3.616										1.26								1.26					0.904			1.26			0.02208	0.5903
1.27			0.9161	3.646										1.27								1.27					0.916			1.27			0.0223	0.5891
1.28			0.9281	3.676										1.28								1.28					0.928			1.28			0.02252	0.5879
1.29			0.9401	3.707			0.465							1.29								1.29					0.94			1.29			0.02274	0.5868			0.00504
1.3			0.952	3.737			0.4116							1.3		0.95134	-0.02281		0.951613			1.3			0.412	0.952				1.3			0.02295	0.5857			0.004002
1.31			0.9639	3.768			0.3703							1.31		-0.59907	0.00515037			0.599092		1.31								1.31			0.02317	0.5847			0.003174
1.32			0.9759	3.798			0.3435							1.32		-0.3435	0.000923077		0.343501	0.343501		1.32								1.32			0.02338	0.5837			0.00268
1.33			0.9878	3.828			0.3228							1.33		0.0073993	3.88763		3.88764	3.88764		1.33								1.33			0.02359	0.5828			0.002324
1.34			0.9997	3.859			0.3056							1.34								1.34								1.34			0.02379	0.5818			0.002048
1.35			1.012	3.889			0.2909							1.35								1.35			0.291	1.011				1.35			0.02399	0.5809			0.001824
1.36			1.023	3.92			0.2779							1.36								1.36								1.36			0.02419	0.5801			0.001638
1.37			1.035	3.95			0.2664							1.37		-0.77377	0.01036			0.773839		1.37								1.37			0.02439	0.5793			0.00148
1.38			1.047	3.981			0.2559							1.38								1.38								1.38			0.02458	0.5785			0.001344
1.39			1.059	4.011			0.2464							1.39								1.39								1.39			0.02477	0.5777			0.001227
1.4			1.071	4.042			0.2377							1.4		1.06977	-0.02802		1.07014	1.07014		1.4								1.4			0.02496	0.5769			0.001123
1.41			1.082	4.072			0.2296							1.41		-0.22959	0.000237191		0.22959	0.22959		1.41			0.23	1.082				1.41			0.02515	0.5762			0.001032
1.42			1.094	4.102			0.2221							1.42								1.42								1.42			0.02533	0.5755			0.0009509
1.43			1.106	4.133			0.2151							1.43								1.43								1.43			0.02551	0.5748			0.0008784
1.44			1.118	4.163			0.2085							1.44								1.44								1.44			0.02569	0.5742			0.0008133
1.45			1.129	4.194			0.2023							1.45		-0.93126	0.0164			0.931404		1.45								1.45			0.02587	0.5736			0.0007545
1.46			1.141	4.224			0.1965							1.46								1.46								1.46			0.02604	0.573			0.0007014
1.47			1.153	4.255			0.191							1.47								1.47								1.47			0.02621	0.5724			0.0006531
1.48			1.164	4.285			0.1859							1.48								1.48								1.48			0.02638	0.5718			0.0006092
1.49			1.176	4.316			0.1809							1.49								1.49								1.49			0.02655	0.5712			0.0005691
1.5			1.188	4.346			0.1762							1.5		1.18653	-0.03338		1.187	1.187		1.5			0.176	1.188				1.5			0.02671	0.5707			0.0005324
1.51			1.199	4.377			0.1718							1.51		-0.17179	8.57113e-05		0.17179	0.17179		1.51								1.51			0.02687	0.5702			0.0004987
1.52			1.211	4.407			0.1675							1.52								1.52								1.52			0.02703	0.5697			0.0004677
1.53			1.222	4.438			0.1635							1.53								1.53								1.53			0.02719	0.5692			0.0004392
1.54			1.234	4.468			0.1596							1.54								1.54								1.54			0.02734	0.5687			0.0004129
1.55			1.246	4.499			0.1559							1.55		-1.09303	0.02353			1.09328		1.55								1.55			0.02749	0.5682			0.0003885
1.56			1.257	4.529			0.1523							1.56								1.56								1.56			0.02764	0.5678			0.000366
1.57			1.269	4.56			0.1489							1.57								1.57								1.57			0.02779	0.5673			0.0003451
1.58			1.28	4.59			0.1456							1.58								1.58								1.58			0.02793	0.5669			0.0003257
1.59			1.292	4.62			0.1425							1.59								1.59								1.59			0.02808	0.5665			0.0003076
1.6			1.303	4.651			0.1395							1.6		1.30153	-0.03881		1.30211	1.30211		1.6			0.139	1.303				1.6			0.02822	0.5661			0.0002908
1.61			1.314	4.681			0.1366							1.61		-0.13656	3.75887e-05		0.13656	0.13656		1.61								1.61			0.02836	0.5657			0.0002752
1.62			1.326	4.712			0.1337							1.62								1.62								1.62			0.0285	0.5653			0.0002606
1.63			1.337	4.742			0.131							1.63								1.63								1.63			0.02863	0.565			0.0002469
1.64			1.349	4.773			0.1284							1.64								1.64								1.64			0.02876	0.5646			0.0002341
1.65			1.36	4.803			0.1259							1.65		-1.23669	0.03039			1.23706		1.65								1.65			0.0289	0.5642			0.0002222
1.66			1.371	4.834			0.1235							1.66								1.66								1.66			0.02902	0.5639			0.000211
1.67			1.383	4.864			0.1211							1.67								1.67								1.67			0.02915	0.5636			0.0002005
1.68			1.394	4.894			0.1188							1.68								1.68								1.68			0.02928	0.5632			0.0001906
1.69			1.405	4.925			0.1166							1.69								1.69								1.69			0.0294	0.5629			0.0001813
1.7			1.417	4.955			0.1145							1.7		1.41486	-0.04426		1.41555	1.41555		1.7			0.114	1.417				1.7			0.02952	0.5626			0.0001726
1.71			1.428	4.986			0.1124							1.71		-0.11242	1.84831e-05		0.11242	0.11242		1.71								1.71			0.02964	0.5623			0.0001644
1.72			1.439	5.016			0.1104							1.72								1.72								1.72			0.02976	0.562			0.0001567
1.73			1.45	5.047			0.1085							1.73								1.73								1.73			0.02988	0.5617			0.0001494
1.74			1.462	5.077			0.1066							1.74								1.74								1.74			0.03	0.5614			0.0001425
1.75			1.473	5.107			0.1047							1.75		-1.37001	0.03702			1.37051		1.75								1.75			0.03011	0.5612			0.000136
1.76			1.484	5.138			0.103							1.76								1.76								1.76			0.03022	0.5609			0.0001299
1.77			1.495	5.168			0.1012							1.77								1.77								1.77			0.03033	0.5606			0.0001241
1.78			1.506	5.199			0.09955							1.78								1.78								1.78			0.03044	0.5604			0.0001186
1.79			1.518	5.229			0.09792							1.79								1.79								1.79			0.03055	0.5601			0.0001134
1.8			1.529	5.259			0.09633							1.8		1.5267	-0.04971		1.52751	1.52751		1.8			0.096	1.529				1.8			0.03065	0.5599			0.0001085
1.81			1.54	5.29			0.09478							1.81		-0.09478	9.84309e-06		0.09478	0.09478		1.81								1.81			0.03076	0.5597			0.0001038
1.82			1.551	5.32			0.09328							1.82								1.82								1.82			0.03086	0.5594			9.942e-05
1.83			1.562	5.35			0.09181							1.83								1.83								1.83			0.03096	0.5592			9.524e-05
1.84			1.573	5.381			0.09039							1.84								1.84								1.84			0.03106	0.559			9.126e-05
1.85			1.584	5.411			0.089							1.85		-1.49655	0.04346			1.49718		1.85								1.85			0.03116	0.5588			8.749e-05
1.86			1.595	5.442			0.08764							1.86								1.86								1.86			0.03126	0.5585			8.39e-05
1.87			1.606	5.472			0.08632							1.87								1.87								1.87			0.03135	0.5583			8.049e-05
1.88			1.618	5.502			0.08503							1.88								1.88								1.88			0.03145	0.5581			7.725e-05
1.89			1.629	5.533			0.08377							1.89								1.89								1.89			0.03154	0.5579			7.417e-05
1.9			1.64	5.563			0.08255							1.9		1.63722	-0.05513		1.63815	1.63815		1.9			0.083	1.639				1.9			0.03163	0.5577			7.123e-05
1.91			1.651	5.593			0.08135							1.91		-0.08135	5.56781e-06		0.08135	0.08135		1.91								1.91			0.03173	0.5575			6.844e-05
1.92			1.662	5.624			0.08018							1.92								1.92								1.92			0.03182	0.5574			6.577e-05
1.93			1.673	5.654			0.07904							1.93								1.93								1.93			0.0319	0.5572			6.323e-05
1.94			1.684	5.684			0.07793							1.94								1.94								1.94			0.03199	0.557			6.081e-05
1.95			1.695	5.715			0.07684							1.95		-1.61832	0.04972			1.61908		1.95								1.95			0.03208	0.5568			5.85e-05
1.96			1.706	5.745			0.07578							1.96								1.96								1.96			0.03216	0.5566			5.629e-05
1.97			1.717	5.775			0.07474							1.97								1.97								1.97			0.03225	0.5565			5.419e-05
1.98			1.727	5.806			0.07372							1.98								1.98								1.98			0.03233	0.5563			5.218e-05
1.99			1.738	5.836			0.07273							1.99								1.99								1.99			0.03241	0.5561			5.025e-05
2			1.749	5.866			0.07175							2		1.74658	-0.06051		1.74763	1.74763		2			0.072	1.749				2			0.03249	0.556			4.842e-05
2.01			1.76	5.897			0.0708							2.01		-0.0708	3.30387e-06		0.0708	0.0708		2.01								2.01			0.03257	0.5558			4.666e-05
2.02			1.771	5.927			0.06987							2.02								2.02								2.02			0.03265	0.5557			4.498e-05
2.03			1.782	5.957			0.06896							2.03								2.03								2.03			0.03273	0.5555			4.337e-05
2.04			1.793	5.988			0.06807							2.04								2.04								2.04			0.0328	0.5554			4.183e-05
2.05			1.804	6.018			0.0672							2.05		-1.73653	0.05583			1.73743		2.05								2.05			0.03288	0.5552			4.036e-05
2.06			1.815	6.048			0.06634							2.06								2.06								2.06			0.03295	0.5551			3.895e-05
2.07			1.825	6.078			0.0655							2.07								2.07								2.07			0.03303	0.555			3.759e-05
2.08			1.836	6.109			0.06468							2.08								2.08								2.08			0.0331	0.5548			3.63e-05
2.09			1.847	6.139			0.06388							2.09								2.09								2.09			0.03317	0.5547			3.505e-05
2.1			1.858	6.169			0.06309							2.1		1.85494	-0.06585		1.85611	1.85611		2.1			0.063	1.858				2.1			0.03324	0.5545			3.386e-05
2.11			1.869	6.2			0.06232							2.11		-0.06232	2.039e-06		0.06232	0.06232		2.11								2.11			0.03331	0.5544			3.272e-05
2.12			1.88	6.23			0.06156							2.12								2.12								2.12			0.03338	0.5543			3.162e-05
2.13			1.89	6.26			0.06082							2.13								2.13								2.13			0.03345	0.5542			3.056e-05
2.14			1.901	6.29			0.06009							2.14								2.14								2.14			0.03351	0.554			2.955e-05
2.15			1.912	6.321			0.05938							2.15		-1.852	0.06179			1.85303		2.15								2.15			0.03358	0.5539			2.858e-05
2.16			1.923	6.351			0.05868							2.16								2.16								2.16			0.03365	0.5538			2.765e-05
2.17			1.934	6.381			0.05799							2.17								2.17								2.17			0.03371	0.5537			2.675e-05
2.18			1.944	6.411			0.05732							2.18								2.18								2.18			0.03378	0.5536			2.588e-05
2.19			1.955	6.442			0.05666							2.19								2.19								2.19			0.03384	0.5535			2.505e-05
2.2			1.966	6.472			0.05601							2.2		1.9624	-0.07115		1.96369	1.96369		2.2			0.056	1.966				2.2			0.0339	0.5533			2.426e-05
2.21			1.976	6.502			0.05537							2.21		-0.05537	1.30048e-06		0.05537	0.05537		2.21								2.21			0.03396	0.5532			2.349e-05
2.22			1.987	6.532			0.05474							2.22								2.22								2.22			0.03402	0.5531			2.275e-05
2.23			1.998	6.563			0.05413							2.23								2.23								2.23			0.03408	0.553			2.204e-05
2.24			2.009	6.593			0.05353							2.24								2.24								2.24			0.03414	0.5529			2.135e-05
2.25			2.019	6.623			0.05293							2.25		-1.9653	0.06763			1.96646		2.25								2.25			0.0342	0.5528			2.069e-05
2.26			2.03	6.653			0.05235							2.26								2.26								2.26			0.03426	0.5527			2.006e-05
2.27			2.041	6.683			0.05178							2.27								2.27								2.27			0.03432	0.5526			1.944e-05
2.28			2.051	6.714			0.05122							2.28								2.28								2.28			0.03437	0.5525			1.885e-05
2.29			2.062	6.744			0.05066							2.29								2.29								2.29			0.03443	0.5524			1.829e-05
2.3			2.073	6.774			0.05012							2.3		2.06909	-0.0764		2.0705	2.0705		2.3			0.05	2.073				2.3			0.03448	0.5523			1.774e-05
2.31			2.083	6.804			0.04959							2.31		-0.04959	8.53293e-07		0.04959	0.04959		2.31								2.31			0.03454	0.5522			1.721e-05
2.32			2.094	6.835			0.04906							2.32								2.32								2.32			0.03459	0.5521			1.67e-05
2.33			2.105	6.865			0.04855							2.33								2.33								2.33			0.03465	0.5521			1.621e-05
2.34			2.115	6.895			0.04804							2.34								2.34								2.34			0.0347	0.552			1.573e-05
2.35			2.126	6.925			0.04754							2.35		-2.07684	0.07336			2.07814		2.35								2.35			0.03475	0.5519			1.527e-05
2.36			2.137	6.955			0.04705							2.36								2.36								2.36			0.0348	0.5518			1.483e-05
2.37			2.147	6.986			0.04657							2.37								2.37								2.37			0.03485	0.5517			1.44e-05
2.38			2.158	7.016			0.04609							2.38								2.38								2.38			0.0349	0.5516			1.399e-05
2.39			2.168	7.046			0.04563							2.39								2.39								2.39			0.03495	0.5515			1.359e-05
2.4			2.179	7.076			0.04517							2.4		2.17509	-0.08161		2.17662	2.17662		2.4			0.045	2.179				2.4			0.035	0.5515			1.32e-05
2.41			2.19	7.106			0.04471							2.41		-0.04471	5.73669e-07		0.04471	0.04471		2.41								2.41			0.03505	0.5514			1.283e-05
2.42			2.2	7.137			0.04427							2.42								2.42								2.42			0.0351	0.5513			1.247e-05
2.43			2.211	7.167			0.04383							2.43								2.43								2.43			0.03515	0.5512			1.212e-05
2.44			2.221	7.197			0.0434							2.44								2.44								2.44			0.03519	0.5511			1.179e-05
2.45			2.232	7.227			0.04297							2.45		-2.18693	0.07899			2.18836		2.45								2.45			0.03524	0.5511			1.146e-05
2.46			2.243	7.257			0.04256							2.46								2.46								2.46			0.03529	0.551			1.115e-05
2.47			2.253	7.287			0.04214							2.47								2.47								2.47			0.03533	0.5509			1.084e-05
2.48			2.264	7.318			0.04174							2.48								2.48								2.48			0.03538	0.5508			1.055e-05
2.49			2.274	7.348			0.04134							2.49								2.49								2.49			0.03542	0.5508			1.026e-05
2.5			2.285	7.378			0.04095							2.5		2.28049	-0.08678		2.28214	2.28214		2.5			0.041	2.284				2.5			0.03546	0.5507			9.986e-06
2.51			2.295	7.408			0.04056							2.51		-0.04056	3.94169e-07		0.04056	0.04056		2.51								2.51			0.03551	0.5506			9.718e-06
2.52			2.306	7.438			0.04018							2.52								2.52								2.52			0.03555	0.5506			9.459e-06
2.53			2.316	7.468			0.0398							2.53								2.53								2.53			0.03559	0.5505			9.209e-06
2.54			2.327	7.499			0.03943							2.54								2.54								2.54			0.03563	0.5504			8.966e-06
2.55			2.337	7.529			0.03906							2.55		-2.29581	0.08452			2.29737		2.55								2.55			0.03568	0.5504			8.73e-06
2.56			2.348	7.559			0.03871							2.56								2.56								2.56			0.03572	0.5503			8.502e-06
2.57			2.358	7.589			0.03835							2.57								2.57								2.57			0.03576	0.5502			8.281e-06
2.58			2.369	7.619			0.038							2.58								2.58								2.58			0.0358	0.5502			8.067e-06
2.59			2.379	7.649			0.03766							2.59								2.59								2.59			0.03584	0.5501			7.859e-06
2.6			2.39	7.68			0.03732							2.6		2.38535	-0.0919		2.38712	2.38712		2.6			0.037	2.39				2.6			0.03588	0.5501			7.658e-06
2.61			2.4	7.71			0.03698							2.61		-0.03698	2.76007e-07		0.03698	0.03698		2.61								2.61			0.03592	0.55			7.463e-06
2.62			2.411	7.74			0.03665							2.62								2.62								2.62			0.03595	0.5499			7.273e-06
2.63			2.421	7.77			0.03633							2.63								2.63								2.63			0.03599	0.5499			7.09e-06
2.64			2.432	7.8			0.03601							2.64								2.64								2.64			0.03603	0.5498			6.912e-06
2.65			2.442	7.83			0.03569							2.65		-2.40367	0.08998			2.40535		2.65								2.65			0.03607	0.5498			6.739e-06
2.66			2.453	7.86			0.03538							2.66								2.66								2.66			0.0361	0.5497			6.571e-06
2.67			2.463	7.89			0.03507							2.67								2.67								2.67			0.03614	0.5497			6.408e-06
2.68			2.474	7.921			0.03477							2.68								2.68								2.68			0.03618	0.5496			6.25e-06
2.69			2.484	7.951			0.03447							2.69								2.69								2.69			0.03621	0.5495			6.096e-06
2.7			2.495	7.981			0.03417							2.7		2.48973	-0.09699		2.49162	2.49162		2.7			0.034	2.494				2.7			0.03625	0.5495			5.947e-06
2.71			2.505	8.011			0.03388							2.71		-0.03388	1.96591e-07		0.03388	0.03388		2.71								2.71			0.03628	0.5494			5.802e-06
2.72			2.516	8.041			0.03359							2.72								2.72								2.72			0.03632	0.5494			5.662e-06
2.73			2.526	8.071			0.03331							2.73								2.73								2.73			0.03635	0.5493			5.525e-06
2.74			2.536	8.101			0.03303							2.74								2.74								2.74			0.03639	0.5493			5.392e-06
2.75			2.547	8.131			0.03275							2.75		-2.51065	0.09536		2.51246	2.51246		2.75								2.75			0.03642	0.5492			5.263e-06
2.76			2.557	8.162			0.03248							2.76								2.76								2.76			0.03645	0.5492			5.138e-06
2.77			2.568	8.192			0.03221							2.77								2.77								2.77			0.03649	0.5491			5.016e-06
2.78			2.578	8.222			0.03194							2.78								2.78								2.78			0.03652	0.5491			4.898e-06
2.79			2.588	8.252			0.03168							2.79								2.79								2.79			0.03655	0.549			4.783e-06
2.8			2.599	8.282			0.03142							2.8		2.59369	-0.10204		2.5957	2.5957		2.8			0.031	2.599				2.8			0.03658	0.549			4.671e-06
2.81			2.609	8.312			0.03117							2.81		-0.03117	1.42191e-07		0.03117	0.03117		2.81								2.81			0.03661	0.5489			4.562e-06
2.82			2.62	8.342			0.03091							2.82								2.82								2.82			0.03665	0.5489			4.456e-06
2.83			2.63	8.372			0.03066							2.83								2.83								2.83			0.03668	0.5489			4.353e-06
2.84			2.641	8.402			0.03042							2.84								2.84								2.84			0.03671	0.5488			4.253e-06
2.85			2.651	8.433			0.03018							2.85		-2.61687	0.10068		2.61881	2.61881		2.85								2.85			0.03674	0.5488			4.156e-06
2.86			2.661	8.463			0.02994							2.86								2.86								2.86			0.03677	0.5487			4.061e-06
2.87			2.672	8.493			0.0297							2.87								2.87								2.87			0.0368	0.5487			3.969e-06
2.88			2.682	8.523			0.02946							2.88								2.88								2.88			0.03683	0.5486			3.879e-06
2.89			2.692	8.553			0.02923							2.89								2.89								2.89			0.03686	0.5486			3.791e-06
2.9			2.703	8.583			0.029							2.9		2.69726	-0.10706		2.69938	2.69938		2.9			0.029	2.702				2.9			0.03689	0.5485			3.706e-06
2.91			2.713	8.613			0.02878							2.91		-0.02878	1.04286e-07		0.02878	0.02878		2.91								2.91			0.03691	0.5485			3.623e-06
2.92			2.724	8.643			0.02856							2.92								2.92								2.92			0.03694	0.5485			3.543e-06
2.93			2.734	8.673			0.02834							2.93								2.93								2.93			0.03697	0.5484			3.464e-06
2.94			2.744	8.703			0.02812							2.94								2.94								2.94			0.037	0.5484			3.388e-06
2.95			2.755	8.733			0.0279							2.95		-2.72244	0.10593		2.7245	2.7245		2.95								2.95			0.03703	0.5483			3.313e-06
2.96			2.765	8.764			0.02769							2.96								2.96								2.96			0.03705	0.5483			3.241e-06
2.97			2.775	8.794			0.02748							2.97								2.97								2.97			0.03708	0.5483			3.17e-06
2.98			2.786	8.824			0.02727							2.98								2.98								2.98			0.03711	0.5482			3.101e-06
2.99			2.796	8.854			0.02707							2.99								2.99								2.99			0.03713	0.5482			3.034e-06
3			2.806	8.884			0.02686							3		2.80048	-0.11205		2.80272	2.80272		3			0.027	2.806				3			0.03716	0.5482			2.969e-06
3.01			2.817	8.914			0.02666							3.01		-0.02666	7.74613e-08		0.02666	0.02666		3.01								3.01			0.03719	0.5481			2.905e-06
3.02			2.827	8.944			0.02647							3.02								3.02								3.02			0.03721	0.5481			2.843e-06
3.03			2.837	8.974			0.02627							3.03								3.03								3.03			0.03724	0.548			2.782e-06
3.04			2.848	9.004			0.02608							3.04								3.04								3.04			0.03726	0.548			2.723e-06
3.05			2.858	9.034			0.02589							3.05								3.05								3.05			0.03729	0.548			2.665e-06
3.06			2.868	9.064			0.0257							3.06								3.06								3.06			0.03731	0.5479			2.609e-06
3.07			2.879	9.094			0.02551							3.07								3.07								3.07			0.03734	0.5479			2.555e-06
3.08			2.889	9.124			0.02532							3.08								3.08								3.08			0.03736	0.5479			2.501e-06
3.09			2.899	9.154			0.02514							3.09								3.09								3.09			0.03739	0.5478			2.449e-06
3.1			2.91	9.185			0.02496							3.1		2.90338	-0.117		2.90574	2.90574		3.1			0.025	2.909				3.1			0.03741	0.5478			2.398e-06
3.11			2.92	9.215			0.02478							3.11		-0.02478	5.82083e-08		0.02478	0.02478		3.11								3.11			0.03743	0.5478			2.349e-06
3.12			2.93	9.245			0.02461							3.12								3.12								3.12			0.03746	0.5477			2.3e-06
3.13			2.94	9.275			0.02443							3.13								3.13								3.13			0.03748	0.5477			2.253e-06
3.14			2.951	9.305			0.02426							3.14								3.14								3.14			0.0375	0.5477			2.207e-06
3.15			2.961	9.335			0.02409							3.15								3.15								3.15			0.03753	0.5476			2.162e-06
3.16			2.971	9.365			0.02392							3.16								3.16								3.16			0.03755	0.5476			2.118e-06
3.17			2.982	9.395			0.02375							3.17								3.17								3.17			0.03757	0.5476			2.075e-06
3.18			2.992	9.425			0.02358							3.18								3.18								3.18			0.03759	0.5475			2.033e-06
3.19			3.002	9.455			0.02342							3.19								3.19								3.19			0.03762	0.5475			1.993e-06
3.2			3.012	9.485			0.02326							3.2		3.00601	-0.12193		3.00848	3.00848		3.2			0.023	3.012				3.2			0.03764	0.5475			1.953e-06
3.21			3.023	9.515			0.0231							3.21		-0.0231	4.42101e-08		0.0231	0.0231		3.21								3.21			0.03766	0.5475			1.914e-06
3.22			3.033	9.545			0.02294							3.22								3.22								3.22			0.03768	0.5474			1.876e-06
3.23			3.043	9.575			0.02278							3.23								3.23								3.23			0.0377	0.5474			1.839e-06
3.24			3.054	9.605			0.02263							3.24								3.24								3.24			0.03772	0.5474			1.802e-06
3.25			3.064	9.635			0.02247							3.25								3.25								3.25			0.03774	0.5473			1.767e-06
3.26			3.074	9.665			0.02232							3.26								3.26								3.26			0.03776	0.5473			1.732e-06
3.27			3.084	9.695			0.02217							3.27								3.27								3.27			0.03779	0.5473			1.699e-06
3.28			3.095	9.725			0.02202							3.28								3.28								3.28			0.03781	0.5473			1.665e-06
3.29			3.105	9.755			0.02188							3.29								3.29								3.29			0.03783	0.5472			1.633e-06
3.3			3.115	9.786			0.02173							3.3		3.10837	-0.12684		3.11096	3.11096		3.3			0.022	3.115				3.3			0.03785	0.5472			1.602e-06
3.31			3.125	9.816			0.02159							3.31		-0.02159	3.39109e-08		0.02159	0.02159		3.31								3.31			0.03787	0.5472			1.571e-06
3.32			3.136	9.846			0.02144							3.32								3.32								3.32			0.03789	0.5471			1.541e-06
3.33			3.146	9.876			0.0213							3.33								3.33								3.33			0.0379	0.5471			1.511e-06
3.34			3.156	9.906			0.02116							3.34								3.34								3.34			0.03792	0.5471			1.482e-06
3.35			3.166	9.936			0.02102							3.35								3.35								3.35			0.03794	0.5471			1.454e-06
3.36			3.177	9.966			0.02089							3.36								3.36								3.36			0.03796	0.547			1.427e-06
3.37			3.187	9.996			0.02075							3.37								3.37								3.37			0.03798	0.547			1.4e-06
3.38			3.197	10.03			0.02062							3.38								3.38								3.38			0.038	0.547			1.374e-06
3.39			3.207	10.06			0.02048							3.39								3.39								3.39			0.03802	0.547			1.348e-06
3.4			3.218	10.09			0.02035							3.4		3.2105	-0.13171		3.2132	3.2132		3.4			0.02	3.217				3.4			0.03804	0.5469			1.323e-06
3.41			3.228	10.12			0.02022							3.41		-0.02022	2.62496e-08		0.02022	0.02022		3.41								3.41			0.03806	0.5469			1.298e-06
3.42			3.238	10.15			0.02009							3.42								3.42								3.42			0.03807	0.5469			1.274e-06
3.43			3.248	10.18			0.01996							3.43								3.43								3.43			0.03809	0.5469			1.25e-06
3.44			3.258	10.21			0.01984							3.44								3.44								3.44			0.03811	0.5468			1.227e-06
3.45			3.269	10.24			0.01971							3.45								3.45								3.45			0.03813	0.5468			1.205e-06
3.46			3.279	10.27			0.01959							3.46								3.46								3.46			0.03814	0.5468			1.183e-06
3.47			3.289	10.3			0.01946							3.47								3.47								3.47			0.03816	0.5468			1.161e-06
3.48			3.299	10.33			0.01934							3.48								3.48								3.48			0.03818	0.5468			1.14e-06
3.49			3.31	10.36			0.01922							3.49								3.49								3.49			0.0382	0.5467			1.119e-06
3.5			3.32	10.39			0.0191							3.5		3.31241	-0.13657		3.31522	3.31522		3.5			0.019	3.319				3.5			0.03821	0.5467			1.099e-06
3.51			3.33	10.42			0.01898							3.51		-0.01898	2.02946e-08		0.01898	0.01898		3.51								3.51			0.03823	0.5467			1.079e-06
3.52			3.34	10.45			0.01887							3.52								3.52								3.52			0.03825	0.5467			1.06e-06
3.53			3.35	10.48			0.01875							3.53								3.53								3.53			0.03826	0.5466			1.041e-06
3.54			3.361	10.51			0.01864							3.54								3.54								3.54			0.03828	0.5466			1.022e-06
3.55			3.371	10.54			0.01852							3.55								3.55								3.55			0.0383	0.5466			1.004e-06
3.56			3.381	10.57			0.01841							3.56								3.56								3.56			0.03831	0.5466			9.864e-07
3.57			3.391	10.6			0.0183							3.57								3.57								3.57			0.03833	0.5466			9.689e-07
3.58			3.401	10.63			0.01819							3.58								3.58								3.58			0.03834	0.5465			9.518e-07
3.59			3.412	10.66			0.01808							3.59								3.59								3.59			0.03836	0.5465			9.351e-07
3.6			3.422	10.69			0.01797							3.6		3.41412	-0.14141		3.41705	3.41705		3.6			0.018	3.421				3.6			0.03837	0.5465			9.187e-07
3.61			3.432	10.72			0.01786							3.61		-0.01786	1.59513e-08		0.01786	0.01786		3.61								3.61			0.03839	0.5465			9.027e-07
3.62			3.442	10.75			0.01775							3.62								3.62								3.62			0.03841	0.5465			8.87e-07
3.63			3.452	10.78			0.01765							3.63								3.63								3.63			0.03842	0.5464			8.716e-07
3.64			3.462	10.81			0.01754							3.64								3.64								3.64			0.03844	0.5464			8.565e-07
3.65			3.473	10.84			0.01744							3.65								3.65								3.65			0.03845	0.5464			8.417e-07
3.66			3.483	10.87			0.01734							3.66								3.66								3.66			0.03847	0.5464			8.272e-07
3.67			3.493	10.9			0.01723							3.67								3.67								3.67			0.03848	0.5464			8.131e-07
3.68			3.503	10.93			0.01713							3.68								3.68								3.68			0.03849	0.5463			7.992e-07
3.69			3.513	10.96			0.01703							3.69								3.69								3.69			0.03851	0.5463			7.855e-07
3.7			3.524	10.99			0.01693							3.7		3.51565	-0.14622		3.51869	3.51869		3.7			0.017	3.523				3.7			0.03852	0.5463			7.722e-07
3.71			3.534	11.02			0.01684							3.71		-0.01684	1.26302e-08		0.01684	0.01684		3.71								3.71			0.03854	0.5463			7.591e-07
3.72			3.544	11.05			0.01674							3.72								3.72								3.72			0.03855	0.5463			7.463e-07
3.73			3.554	11.08			0.01664							3.73								3.73								3.73			0.03857	0.5462			7.337e-07
3.74			3.564	11.11			0.01655							3.74								3.74								3.74			0.03858	0.5462			7.214e-07
3.75			3.574	11.14			0.01645							3.75								3.75								3.75			0.03859	0.5462			7.093e-07
3.76			3.585	11.17			0.01636							3.76								3.76								3.76			0.03861	0.5462			6.975e-07
3.77			3.595	11.2			0.01626							3.77								3.77								3.77			0.03862	0.5462			6.859e-07
3.78			3.605	11.23			0.01617							3.78								3.78								3.78			0.03864	0.5462			6.745e-07
3.79			3.615	11.26			0.01608							3.79								3.79								3.79			0.03865	0.5461			6.633e-07
3.8			3.625	11.29			0.01599							3.8		3.61701	-0.15102		3.62016	3.62016		3.8			0.016	3.625				3.8			0.03866	0.5461			6.524e-07
3.81			3.635	11.32			0.0159							3.81		-0.0159	1.00697e-08		0.0159	0.0159		3.81								3.81			0.03868	0.5461			6.416e-07
3.82			3.646	11.35			0.01581							3.82								3.82								3.82			0.03869	0.5461			6.311e-07
3.83			3.656	11.38			0.01572							3.83								3.83								3.83			0.0387	0.5461			6.208e-07
3.84			3.666	11.41			0.01563							3.84								3.84								3.84			0.03871	0.5461			6.107e-07
3.85			3.676	11.44			0.01555							3.85								3.85								3.85			0.03873	0.546			6.007e-07
3.86			3.686	11.47			0.01546							3.86								3.86								3.86			0.03874	0.546			5.91e-07
3.87			3.696	11.5			0.01538							3.87								3.87								3.87			0.03875	0.546			5.814e-07
3.88			3.706	11.53			0.01529							3.88								3.88								3.88			0.03877	0.546			5.721e-07
3.89			3.717	11.56			0.01521							3.89								3.89								3.89			0.03878	0.546			5.629e-07
3.9			3.727	11.59			0.01512							3.9		3.71821	-0.1558		3.72147	3.72147		3.9			0.015	3.726				3.9			0.03879	0.546			5.538e-07
3.91			3.737	11.62			0.01504							3.91		-0.01504	8.08049e-09		0.01504	0.01504		3.91								3.91			0.0388	0.5459			5.45e-07
3.92			3.747	11.65			0.01496							3.92								3.92								3.92			0.03881	0.5459			5.363e-07
3.93			3.757	11.68			0.01488							3.93								3.93								3.93			0.03883	0.5459			5.277e-07
3.94			3.767	11.71			0.0148							3.94								3.94								3.94			0.03884	0.5459			5.194e-07
3.95			3.777	11.74			0.01472							3.95								3.95								3.95			0.03885	0.5459			5.112e-07
3.96			3.788	11.77			0.01464							3.96								3.96								3.96			0.03886	0.5459			5.031e-07
3.97			3.798	11.8			0.01456							3.97								3.97								3.97			0.03887	0.5459			4.952e-07
3.98			3.808	11.83			0.01448							3.98								3.98								3.98			0.03889	0.5458			4.874e-07
3.99			3.818	11.86			0.0144							3.99								3.99								3.99			0.0389	0.5458			4.798e-07
4			3.828	11.89			0.01433							4		3.81928	-0.16057		3.82265	3.82265		4			0.014	3.827				4			0.03891	0.5458			4.723e-07
																																					4.723e-07

## Sheet: Data 2b
1st level HB solution														2 term Class HB solution
		1st mode			3rd mode			Overall						1st mode	3rd mode		Overall
		Amplitude Ratio			Amplitude Ratio			Amplitude Ratio						Amplitude Ratio
		(1,1) mode			(1,3) mode
														(1,1) mode	(1,3) mode
0.2	0.2138	0.214			0.00287		0.213839	0.214038				0.2		0.21401	0.00286984		0.214048
0.21	0.2146	0.2148			0.00287		0.214638	0.214838				0.21
0.22	0.2154	0.2157			0.002871		0.215438	0.215738				0.22
0.23	0.2163	0.2166			0.002871		0.216338	0.216638				0.23
0.24	0.2173	0.2176			0.002872		0.217338	0.217638				0.24
0.25	0.2183	0.2186			0.002872		0.218338	0.218638				0.25
0.26	0.2193	0.2197			0.002873		0.219338	0.219738				0.26
0.27	0.2204	0.2209			0.002874		0.220437	0.220937				0.27
0.28	0.2215	0.2221			0.002874		0.221537	0.222137				0.28
0.29	0.2227	0.2235			0.002875		0.222737	0.223537				0.29
0.3	0.2249	0.2249			0.002876		0.224937	0.224937				0.3
0.31	0.2266	0.2266			0.002876		0.226636	0.226636				0.31
0.32	0.2287	0.2286			0.002877		0.228736	0.228636				0.32
0.33	0.2319	0.2317			0.002878		0.231936	0.231736				0.33
0.34	0.2295	0.2398			0.002879		0.229536	0.239835				0.34
0.35	0.231	0.2782			0.002879		0.231036	0.27823				0.35					0.28045
0.36	0.2388	0.354			0.00288		0.238835	0.354023				0.36
0.37	0.2348	0.428			0.002881		0.234835	0.428019				0.37					0.4298
0.38	0.2358	0.4949			0.002882		0.235835	0.494917				0.38
0.39	0.2374	0.5561			0.002883		0.237435	0.556115				0.39
0.4	0.2392	0.6132			0.002884		0.239235	0.613214				0.4		0.23915	0.0028837			0.61823
0.41	0.2412	0.6669			0.002885		0.241235	0.666912				0.41
0.42	0.2432	0.7182			0.002886		0.243234	0.718212				0.42
0.43	0.2453	0.7675			0.002887		0.245334	0.767511				0.43
0.44	0.2474	0.8152			0.002888		0.247434	0.81521				0.44
0.45	0.2497	0.8615			0.002889		0.249733	0.86151				0.45
0.46	0.252	0.9066			0.00289		0.252033	0.906609				0.46
0.47	0.2544	0.9506			0.002891		0.254433	0.950609				0.47
0.48	0.257	0.9935			0.002892		0.257033	0.993508				0.48
0.49	0.2596	1.035			0.002893		0.259632	1.03501				0.49
0.5	0.2623	1.076			0.002894		0.262332	1.07601				0.5
0.51	0.2651	1.115			0.002895		0.265132	1.11501				0.51
0.52	0.268	1.153			0.002897		0.268031	1.15301				0.52
0.53	0.271	1.189			0.002898		0.271031	1.18901				0.53
0.54	0.2741	1.22			0.002899		0.274131	1.22001				0.54
0.55	0.2773	1.269			0.0029		0.27733	1.26901				0.55
0.56	0.2807	1.301			0.002902		0.28073	1.30101				0.56
0.57	0.2841				0.002903		0.28413					0.57
0.58	0.2877				0.002904		0.287729					0.58
0.59	0.2915				0.002906		0.291529					0.59
0.6	0.2953				0.002907		0.295329					0.6		0.29531	0.0029071		0.295339
0.61	0.2993				0.002909		0.299328					0.61
0.62	0.3035				0.00291		0.303528					0.62
0.63	0.3077				0.002911		0.307728					0.63
0.64	0.3122				0.002913		0.312227					0.64
0.65	0.3168				0.002914		0.316827					0.65
0.66	0.3216				0.002916		0.321626					0.66
0.67	0.3265				0.002918		0.326526					0.67
0.68	0.3316				0.002919		0.331626					0.68
0.69	0.3369				0.002921		0.336925					0.69
0.7	0.3423				0.002923		0.342325					0.7
0.71	0.348				0.002924		0.348025					0.71
0.72	0.3538				0.002926		0.353824					0.72
0.73	0.3598				0.002928		0.359824					0.73
0.74	0.366				0.002929		0.366023					0.74
0.75	0.3725				0.002931		0.372523					0.75
0.76	0.3791				0.002933		0.379123					0.76
0.77	0.3859				0.002935		0.385922					0.77
0.78	0.3929				0.002937		0.392922					0.78
0.79	0.4002				0.002939		0.400222					0.79
0.8	0.4076				0.002941		0.407621					0.8		0.40761	0.0029405		0.407631
0.81	0.4153				0.002942		0.415321					0.81
0.82	0.4232				0.002944		0.42322					0.82
0.83	0.4313				0.002946		0.43132					0.83
0.84	0.4396				0.002948		0.43962					0.84
0.85	0.4481				0.00295		0.448119					0.85
0.86	0.4568				0.002953		0.456819					0.86
0.87	0.4657				0.002955		0.465719					0.87
0.88	0.4748				0.002957		0.474818					0.88
0.89	0.4841				0.002959		0.484118					0.89
0.9	0.4935				0.002961		0.493518					0.9
0.91	0.5032				0.002963		0.503217					0.91
0.92	0.513				0.002966		0.513017					0.92
0.93	0.523				0.002968		0.523017					0.93
0.94	0.5332				0.00297		0.533217					0.94
0.95	0.5435				0.002973		0.543516					0.95		0.54334	0.00297253		0.543356
0.96	0.5539				0.002975		0.553916					0.96
0.97	0.5645				0.002977		0.564516					0.97
0.98	0.5752				0.00298		0.575215					0.98
0.99	0.5861				0.002982		0.586115					0.99
1	0.597				0.002985		0.597015					1
1.01	0.6081				0.002987		0.608115					1.01
1.02	0.6193				0.00299		0.619314					1.02
1.03	0.6305				0.002992		0.630514					1.03
1.04	0.6419				0.002995		0.641914					1.04
1.05	0.6533				0.002997		0.653314					1.05
1.06	0.6648				0.003		0.664814					1.06
1.07	0.6763				0.003003		0.676313					1.07
1.08	0.688				0.003005		0.688013					1.08
1.09	0.6996				0.003008		0.699613					1.09
1.1	0.7113				0.003011		0.711313					1.1		0.71092	0.00301094		0.710933
1.11	0.7231				0.003014		0.723113					1.11
1.12	0.7349				0.003017		0.734912					1.12
1.13	0.7467				0.003019		0.746712					1.13
1.14	0.7586				0.003022		0.758612					1.14
1.15	0.7705				0.003025		0.770512					1.15
1.16	0.7824				0.003028		0.782412					1.16
1.17	0.7943				0.003031		0.794312					1.17
1.18	0.8063				0.003034		0.806311					1.18
1.19	0.8183				0.003037		0.818311					1.19
1.2	0.8302				0.00304		0.830211					1.2
1.21	0.8422				0.003043		0.842211					1.21
1.22	0.8542				0.003047		0.854211					1.22
1.23	0.8662				0.00305		0.866211					1.23
1.24	0.8782				0.003053		0.878211					1.24
1.25	0.8902				0.003056		0.89021					1.25		0.88887	0.00305621		0.888881
1.26	0.9022				0.003059		0.90221					1.26
1.27	0.9141				0.003063		0.91411					1.27
1.28	0.9261				0.003066		0.92611					1.28
1.29	0.9381			0.48165	0.00307		0.93811			0.48167		1.29
1.3	0.9501			0.4045	0.003073		0.95011			0.404523		1.3		0.55665	0.00307292
1.31	0.962			0.3669	0.003076		0.96201			0.366926		1.31		0.36698	0.00307637		0.367006
1.32	0.974			0.3411	0.00308		0.97401			0.341128		1.32
1.33	0.986			0.3209	0.003083		0.98601			0.32093		1.33
1.34	0.9979			0.3041	0.003087		0.99791			0.304131		1.34
1.35	1.01			0.2896	0.00309		1.01001			0.289633		1.35		0.73148	0.00309049
1.36	1.022			0.2769	0.003094		1.02201			0.276935		1.36
1.37	1.034			0.2655	0.003098		1.03401			0.265536		1.37
1.38	1.046			0.2551	0.003101		1.04601			0.255138		1.38
1.39	1.057			0.2457	0.003105		1.05701			0.245739		1.39
1.4	1.069			0.237	0.003109		1.06901			0.237041		1.4		1.06614	0.00310892		1.06615
1.41	1.081			0.229	0.003113		1.08101			0.229042		1.41
1.42	1.093			0.2216	0.003117		1.09301			0.221644		1.42
1.43	1.105			0.2146	0.00312		1.10501			0.214645		1.43
1.44	1.117			0.2081	0.003124		1.11701			0.208147		1.44		0.20808	0.00312432		0.208127
1.45	1.129			0.2019	0.003128		1.12901			0.201948		1.45		0.93684	0.00312827
1.46	1.14			0.1962	0.003132		1.14001			0.19625		1.46
1.47	1.152			0.1907	0.003136		1.15201			0.190752		1.47
1.48	1.164			0.1855	0.00314		1.16401			0.185553		1.48
1.49	1.176			0.1806	0.003144		1.17601			0.180655		1.49
1.5	1.188			0.176	0.003149		1.18801			0.176056		1.5
1.51	1.199			0.1715	0.003153		1.19901			0.171558		1.51
1.52	1.211			0.1673	0.003157		1.21101			0.16736		1.52
1.53	1.223			0.1633	0.003161		1.22301			0.163361		1.53
1.54	1.235			0.1594	0.003165		1.23501			0.159463		1.54
1.55	1.246			0.1557	0.00317		1.24601			0.155765		1.55		1.23967	0.00316978		1.23968
1.56	1.258			0.1521	0.003174		1.25801			0.152166		1.56		1.11424	0.00317415
1.57	1.27			0.1487	0.003179		1.27001			0.148768		1.57
1.58	1.281			0.1455	0.003183		1.28101			0.14557		1.58
1.59	1.293			0.1423	0.003187		1.29301			0.142371		1.59
1.6	1.305			0.1393	0.003192		1.30501			0.139373		1.6
1.61	1.316			0.1364	0.003197		1.31601			0.136475		1.61
1.62	1.328			0.1336	0.003201		1.32801			0.133677		1.62
1.63	1.34			0.1309	0.003206		1.34001			0.130978		1.63
1.64	1.351			0.1283	0.003211		1.35101			0.12838		1.64		0.1283	0.00321056		0.12838
1.65	1.363			0.1258	0.003215		1.36301			0.125882		1.65
1.66	1.375			0.1234	0.00322		1.37501			0.123484		1.66
1.67	1.386			0.121	0.003225		1.38601			0.121086		1.67
1.68	1.398			0.1187	0.00323		1.39801			0.118788		1.68		1.28476	0.00322978
1.69	1.41			0.1165	0.003235		1.41001			0.11659		1.69
1.7	1.421			0.1144	0.00324		1.42101			0.114492		1.7		1.4092	0.00323965		1.40921
1.71	1.433			0.1123	0.003245		1.43301			0.112394		1.71
1.72	1.444			0.1103	0.00325		1.44401			0.110396		1.72
1.73	1.456			0.1084	0.003255		1.45601			0.108498		1.73
1.74	1.467			0.1065	0.00326		1.46701			0.1066		1.74
1.75	1.479			0.1047	0.003265		1.47901			0.104802		1.75
1.76	1.491			0.1029	0.00327		1.49101			0.103004		1.76
1.77	1.502			0.1012	0.003276		1.50201			0.101306		1.77
1.78	1.514			0.09949	0.003281		1.51401			0.0995981		1.78
1.79	1.525			0.09786	0.003286		1.52501			0.0979703		1.79
1.8	1.537			0.09627	0.003292		1.53701			0.0963825		1.8
1.81	1.548			0.09472	0.003297		1.54801			0.0948347		1.81
1.82	1.56			0.09322	0.003303		1.56001			0.093337		1.82
1.83	1.571			0.09176	0.003308		1.57101			0.0918792		1.83
1.84	1.583			0.09033	0.003314		1.58301			0.0904515		1.84		1.49299	0.00331391
1.85	1.594			0.08894	0.00332		1.59401			0.0890638		1.85		1.57512	0.00331957		1.57513
1.86	1.606			0.08759	0.003325		1.60601			0.0877161		1.86
1.87	1.617			0.08627	0.003331		1.61701			0.0863985		1.87
1.88	1.629			0.08499	0.003337		1.62901			0.0851209		1.88
1.89	1.64			0.08373	0.003343		1.64001			0.0838634		1.89
1.9	1.652			0.08251	0.003349		1.65201			0.0826458		1.9		0.08251	0.00334866		0.0826458
1.91	1.663			0.08131	0.003355		1.66301			0.0814483		1.91
1.92	1.675			0.08014	0.003361		1.67501			0.0802808		1.92
1.93	1.686			0.079	0.003367		1.68601			0.0791434		1.93
1.94	1.698			0.07789	0.003373		1.69801			0.0780359		1.94
1.95	1.709			0.0768	0.003379		1.70901			0.0769485		1.95
1.96	1.721			0.07574	0.003385		1.72101			0.0758911		1.96
1.97	1.732			0.0747	0.003392		1.73201			0.0748539		1.97
1.98	1.744			0.07369	0.003398		1.74401			0.0738465		1.98
1.99	1.755			0.07269	0.003404		1.75501			0.0728492		1.99
2	1.766			0.07172	0.003411		1.76601			0.071882		2		1.73787	0.00341083		1.73788
2.01	1.778			0.07077	0.003417		1.77801			0.0709348		2.01
2.02	1.789			0.06984	0.003424		1.78901			0.0700077		2.02
2.03	1.801			0.06893	0.003431		1.80101			0.0691006		2.03
2.04	1.812			0.06804	0.003437		1.81201			0.0682134		2.04
2.05	1.823			0.06717	0.003444		1.82301			0.0673464		2.05
2.06	1.835			0.06632	0.003451		1.83501			0.0664993		2.06
2.07	1.846			0.06548	0.003458		1.84601			0.0656624		2.07
2.08	1.858			0.06466	0.003465		1.85801			0.0648454		2.08
2.09	1.869			0.06386	0.003472		1.86901			0.0640485		2.09
2.1	1.88			0.06307	0.003479		1.88001			0.0632616		2.1
2.11	1.892			0.0623	0.003486		1.89201			0.0624948		2.11
2.12	1.903			0.06154	0.003493		1.90301			0.0617379		2.12
2.13	1.914			0.0608	0.0035		1.91401			0.0610011		2.13
2.14	1.925			0.06007	0.003508		1.92501			0.0602745		2.14
2.15	1.937			0.05936	0.003515		1.93701			0.0595678		2.15		1.89758	0.00351498		1.89759
2.16	1.948			0.05866	0.003522		1.94801			0.0588711		2.16
2.17	1.959			0.05797	0.00353		1.95901			0.0581846		2.17
2.18	1.971			0.0573	0.003538		1.97101			0.057518		2.18
2.19	1.982			0.05664	0.003545		1.98201			0.0568614		2.19
2.2	1.993			0.05599	0.003553		1.99301			0.056215		2.2		0.05599	0.00355288		0.056215
2.21	2.004			0.05535	0.003561		2.00401			0.0555786		2.21
2.22	2.015			0.05473	0.003569		2.01501			0.0549622		2.22
2.23	2.027			0.05411	0.003576		2.02701			0.0543458		2.23
2.24	2.038			0.05351	0.003584		2.03801			0.0537495		2.24
2.25	2.049			0.05292	0.003593		2.04901			0.0531634		2.25
2.26	2.06			0.05234	0.003601		2.06001			0.0525872		2.26
2.27	2.071			0.05176	0.003609		2.07101			0.052011		2.27
2.28	2.082			0.0512	0.003617		2.08201			0.0514549		2.28
2.29	2.092			0.05065	0.003626		2.09201			0.0509089		2.29
2.3	2.103			0.05011	0.003634		2.10301			0.0503728		2.3
2.31	2.113			0.04957	0.003642		2.11301			0.0498369		2.31
2.32				0.04905	0.003651					0.049321		2.32
2.33				0.04853	0.00366					0.0488052		2.33		2.08185	0.00365974		2.08186
2.34				0.04803	0.003668					0.0483093		2.34
2.35				0.04753	0.003677					0.0478136		2.35
2.36				0.04704	0.003686					0.0473279		2.36
2.37				0.04656	0.003695					0.0468523		2.37
2.38				0.04608	0.003704					0.0463768		2.38
2.39				0.04561	0.003713					0.0459113		2.39
2.4				0.04515	0.003723					0.045456		2.4
2.41				0.0447	0.003732					0.0450105		2.41
2.42				0.04426	0.003741					0.0445751		2.42
2.43				0.04382	0.003751					0.0441399		2.43
2.44				0.04339	0.003761					0.0437148		2.44
2.45				0.04296	0.00377					0.0432896		2.45
2.46				0.04255	0.00378					0.0428845		2.46
2.47				0.04213	0.00379					0.0424696		2.47
2.48				0.04173	0.0038					0.0420746		2.48
2.49				0.04133	0.00381					0.0416797		2.49
2.5				0.04094	0.00382					0.0412949		2.5		0.04094	0.00381993		0.0412949
2.51				0.04055	0.00383					0.0409101		2.51
2.52				0.04017	0.00384					0.0405354		2.52
2.53				0.03979	0.003851					0.040161		2.53
2.54				0.03942	0.003861					0.0397964		2.54
2.55				0.03906	0.003872					0.039442		2.55
2.56				0.0387	0.003883					0.0390877		2.56
2.57				0.03834	0.003894					0.0387335		2.57
2.58				0.03799	0.003905					0.0383893		2.58
2.59				0.03765	0.003916					0.0380551		2.59
2.6				0.03731	0.003927					0.0377211		2.6
2.61				0.03698	0.003938					0.037397		2.61
2.62				0.03665	0.003949					0.0370731		2.62
2.63				0.03632	0.003961					0.0367494		2.63
2.64				0.036	0.003972					0.0364356		2.64
2.65				0.03568	0.003984					0.0361221		2.65
2.66				0.03537	0.003996					0.0358186		2.66
2.67				0.03506	0.004008					0.0355152		2.67
2.68				0.03476	0.00402					0.0352218		2.68
2.69				0.03446	0.004032					0.0349286		2.69
2.7				0.03416	0.004044					0.0346354		2.7
2.71				0.03387	0.004057					0.0343525		2.71
2.72				0.03359	0.004069					0.0340793		2.72
2.73				0.0333	0.004082					0.0337967		2.73
2.74				0.03302	0.004094					0.0335238		2.74
2.75				0.03275	0.004107					0.033261		2.75
2.76				0.03247	0.00412					0.0329886		2.76
2.77				0.0322	0.004133					0.0327262		2.77
2.78				0.03194	0.004147					0.032474		2.78
2.79				0.03168	0.00416					0.0322216		2.79
2.8				0.03142	0.004174					0.0319697		2.8		0.03142	0.00417365		0.0319696
2.81				0.03116	0.004187					0.0317176		2.81
2.82				0.03091	0.004201					0.0314758		2.82
2.83				0.03066	0.004215					0.0312341		2.83
2.84				0.03041	0.004229					0.0309925		2.84
2.85				0.03017	0.004243					0.0307609		2.85
2.86				0.02993	0.004258					0.0305298		2.86
2.87				0.02969	0.004272					0.0302984		2.87
2.88				0.02946	0.004287					0.0300774		2.88
2.89				0.02923	0.004302					0.0298564		2.89
2.9				0.029	0.004317					0.0296357		2.9
2.91				0.02877	0.004332					0.0294151		2.91
2.92				0.02855	0.004347					0.0292044		2.92
2.93				0.02833	0.004363					0.0289941		2.93
2.94				0.02811	0.004379					0.0287841		2.94
2.95				0.0279	0.004394					0.0285836		2.95
2.96				0.02769	0.00441					0.0283837		2.96
2.97				0.02748	0.004427					0.0281842		2.97
2.98				0.02727	0.004443					0.0279845		2.98
2.99				0.02706	0.004459					0.027785		2.99
3				0.02686	0.004476					0.0275958		3
3.01				0.02666	0.004493					0.0274067		3.01
3.02				0.02646	0.00451					0.0272179		3.02
3.03				0.02627	0.004527					0.0270389		3.03
3.04				0.02607	0.004545					0.0268507		3.04
3.05				0.02588	0.004562					0.026672		3.05
3.06				0.02569	0.00458					0.0264939		3.06
3.07				0.02551	0.004598					0.0263257		3.07
3.08				0.02532	0.004616					0.026148		3.08
3.09				0.02514	0.004635					0.0259805		3.09
3.1				0.02496	0.004653					0.0258128		3.1		0.02496	0.00465328		0.0258129
3.11				0.02478	0.004672					0.0256457		3.11
3.12				0.0246	0.004691					0.0254788		3.12
3.13				0.02443	0.00471					0.0253218		3.13
3.14				0.02425	0.00473					0.0251557		3.14
3.15				0.02408	0.00475					0.0249994		3.15
3.16				0.02391	0.00477					0.0248434		3.16
3.17				0.02375	0.00479					0.0246972		3.17
3.18				0.02358	0.00481					0.0245416		3.18
3.19				0.02342	0.004831					0.0243962		3.19
3.2				0.02326	0.004852					0.024251		3.2
3.21				0.0231	0.004873					0.0241061		3.21
3.22				0.02294	0.004894					0.0239613		3.22
3.23				0.02278	0.004916					0.0238173		3.23
3.24				0.02262	0.004938					0.0236734		3.24
3.25				0.02247	0.00496					0.0235394		3.25
3.26				0.02232	0.004982					0.0234056		3.26
3.27				0.02217	0.005005					0.0232725		3.27
3.28				0.02202	0.005028					0.0231396		3.28
3.29				0.02187	0.005051					0.023007		3.29
3.3				0.02173	0.005075					0.0228846		3.3
3.31				0.02158	0.005099					0.0227529		3.31
3.32				0.02144	0.005123					0.022631		3.32
3.33				0.0213	0.005147					0.0225094		3.33
3.34				0.02116	0.005172					0.0223885		3.34
3.35				0.02102	0.005197					0.0222679		3.35
3.36				0.02088	0.005223					0.022148		3.36
3.37				0.02075	0.005248					0.0220374		3.37
3.38				0.02061	0.005275					0.0219186		3.38
3.39				0.02048	0.005301					0.021809		3.39
3.4				0.02035	0.005328					0.0217002		3.4		0.02035	0.00532766		0.0217
3.41				0.02022	0.005355					0.0215917		3.41
3.42				0.02009	0.005382					0.0214835		3.42
3.43				0.01996	0.00541					0.0213761		3.43
3.44				0.01983	0.005438					0.0212691		3.44
3.45				0.01971	0.005467					0.0211722		3.45
3.46				0.01959	0.005496					0.0210756		3.46
3.47				0.01946	0.005525					0.02097		3.47
3.48				0.01934	0.005555					0.0208747		3.48
3.49				0.01922	0.005585					0.0207796		3.49
3.5				0.0191	0.005616					0.0206855		3.5
3.51				0.01898	0.005647					0.0205917		3.51
3.52				0.01887	0.005678					0.0205075		3.52
3.53				0.01875	0.00571					0.020415		3.53
3.54				0.01863	0.005742					0.0203228		3.54
3.55				0.01852	0.005775					0.0202408		3.55
3.56				0.01841	0.005808					0.0201592		3.56
3.57				0.0183	0.005842					0.0200785		3.57
3.58				0.01819	0.005876					0.0199983		3.58
3.59				0.01808	0.005911					0.019919		3.59
3.6				0.01797	0.005946					0.0198401		3.6
3.61				0.01786	0.005982					0.0197623		3.61
3.62				0.01775	0.006018					0.0196849		3.62
3.63				0.01765	0.006055					0.0196176		3.63
3.64				0.01754	0.006093					0.0195423		3.64
3.65				0.01744	0.006131					0.0194764		3.65
3.66				0.01734	0.006169					0.019411		3.66
3.67				0.01723	0.006208					0.0193378		3.67
3.68				0.01713	0.006248					0.0192746		3.68
3.69				0.01703	0.006288					0.0192119		3.69
3.7				0.01693	0.006329					0.0191504		3.7		0.01693	0.00632934		0.0191506
3.71				0.01683	0.006371					0.01909		3.71
3.72				0.01674	0.006413					0.0190389		3.72
3.73				0.01664	0.006456					0.0189802		3.73
3.74				0.01655	0.0065					0.0189315		3.74
3.75				0.01645	0.006544					0.0188746		3.75
3.76				0.01636	0.00659					0.0188283		3.76
3.77				0.01626	0.006636					0.0187739		3.77
3.78				0.01617	0.006682					0.0187288		3.78
3.79				0.01608	0.00673					0.0186856		3.79
3.8				0.01599	0.006778					0.018643		3.8
3.81				0.0159	0.006827					0.0186018		3.81
3.82				0.01581	0.006877					0.0185619		3.82
3.83				0.01572	0.006928					0.0185233		3.83
3.84				0.01563	0.006979					0.0184854		3.84
3.85				0.01555	0.007032					0.0184581		3.85
3.86				0.01546	0.007086					0.0184237		3.86
3.87				0.01537	0.00714					0.0183901		3.87
3.88				0.01529	0.007196					0.0183671		3.88
3.89				0.01521	0.007252					0.0183447		3.89
3.9				0.01512	0.00731					0.0183163		3.9
3.91				0.01504	0.007368					0.0182969		3.91
3.92				0.01496	0.007428					0.0182798		3.92
3.93				0.01488	0.007489					0.0182643		3.93
3.94				0.0148	0.007551					0.0182503		3.94
3.95				0.01472	0.007614					0.018238		3.95
3.96				0.01464	0.007679					0.0182281		3.96
3.97				0.01456	0.007744					0.018219		3.97
3.98				0.01448	0.007811					0.0182125		3.98
3.99				0.0144	0.00788					0.0182085		3.99
4				0.01433	0.007949					0.0182132		4		0.01433	0.0079493		0.0182135
4.01				0.01425	0.00802					0.0182127		4.01
4.02				0.01417	0.008093					0.0182149		4.02
4.03				0.0141	0.008167					0.0182266		4.03
4.04				0.01402	0.008243					0.0182333		4.04
4.05				0.01395	0.00832					0.0182496		4.05
4.06				0.01388	0.008399					0.0182686		4.06
4.07				0.01381	0.00848					0.0182903		4.07
4.08				0.01373	0.008562					0.0183065		4.08
4.09				0.01366	0.008646					0.0183331		4.09
4.1				0.01359	0.008732					0.0183626		4.1
4.11				0.01352	0.008821					0.0183959		4.11
4.12				0.01345	0.008911					0.0184313		4.12
4.13				0.01338	0.009003					0.0184698		4.13
4.14				0.01331	0.009097					0.0185113		4.14
4.15				0.01325	0.009194					0.018564		4.15
4.16				0.01318	0.009292					0.0186117		4.16
4.17				0.01311	0.009394					0.0186646		4.17
4.18				0.01305	0.009497					0.0187267		4.18
4.19				0.01298	0.009604					0.0187871		4.19
4.2				0.01291	0.009712					0.0188498		4.2
4.21				0.01285	0.009824					0.0189247		4.21
4.22				0.01278	0.009939					0.0189973		4.22
4.23				0.01272	0.01006					0.0190842		4.23
4.24				0.01266	0.01018					0.0191713		4.24
4.25				0.01259	0.0103					0.0192533		4.25
4.26				0.01253	0.01043					0.0193538		4.26
4.27				0.01247	0.01056					0.0194558		4.27
4.28				0.01241	0.01069					0.0195591		4.28
4.29				0.01235	0.01083					0.0196749		4.29
4.3				0.01229	0.01097					0.0197921		4.3		0.01229	0.01097		0.0197921
4.31				0.01223	0.01112					0.0199219		4.31
4.32				0.01217	0.01127					0.0200533		4.32
4.33				0.01211	0.01142					0.0201863		4.33
4.34				0.01205	0.01158					0.0203321		4.34
4.35				0.01199	0.01175					0.0204911		4.35
4.36				0.01193	0.01192					0.0206518		4.36
4.37				0.01187	0.01209					0.0208143		4.37
4.38				0.01182	0.01227					0.0209957		4.38
4.39				0.01176	0.01246					0.0211849		4.39
4.4				0.0117	0.01265					0.021376		4.4
4.41				0.01165	0.01285					0.0215863		4.41
4.42				0.01159	0.01305					0.021793		4.42
4.43				0.01154	0.01327					0.0220308		4.43
4.44				0.01148	0.01349					0.0222655		4.44
4.45				0.01143	0.01371					0.0225072		4.45
4.46				0.01137	0.01395					0.0227702		4.46
4.47				0.01132	0.0142					0.0230526		4.47
4.48				0.01127	0.01445					0.023337		4.48
4.49				0.01122	0.01471					0.0236359		4.49
4.5				0.01116	0.01499					0.0239572		4.5
4.51				0.01111	0.01527					0.0242853		4.51
4.52				0.01106	0.01557					0.0246409		4.52
4.53				0.01101	0.01588					0.0250114		4.53
4.54				0.01096	0.0162					0.0253969		4.54
4.55				0.01091	0.01654					0.0258103		4.55
4.56				0.01086	0.01689					0.026239		4.56
4.57				0.01081	0.01726					0.0266959		4.57
4.58				0.01076	0.01764					0.0271683		4.58
4.59				0.01071	0.01804					0.0276692		4.59
4.6				0.01066	0.01847					0.028212		4.6		0.01066	0.01847		0.028212
4.61				0.01061	0.01891					0.0287706		4.61
4.62				0.01056	0.01937					0.0293583		4.62
4.63				0.01051	0.01986					0.0299883		4.63
4.64				0.01047	0.02037					0.0306512		4.64
4.65				0.01042	0.02092					0.0313667		4.65
4.66				0.01037	0.02149					0.0321119		4.66
4.67				0.01033	0.02209					0.0329036		4.67
4.68				0.01028	0.02274					0.0337623		4.68
4.69				0.01023	0.02341					0.0346512		4.69
4.7				0.01019	0.02414					0.0356275		4.7
4.71				0.01014	0.0249					0.0366448		4.71
4.72				0.0101	0.02572					0.0377498		4.72
4.73				0.01005	0.02659					0.0389238		4.73
4.74				0.01001	0.02752					0.0401858		4.74
4.75				0.009966	0.02852					0.0415464		4.75
4.76				0.009922	0.0296					0.0430205		4.76
4.77				0.009879	0.03075					0.0445951		4.77
4.78				0.009835	0.03199					0.0462974		4.78
4.79				0.009792	0.03333					0.0481421		4.79
4.8				0.00975	0.03479					0.0501573		4.8
4.81				0.009708	0.03636					0.0523292		4.81
4.82				0.009665	0.03808					0.0547137		4.82
4.83				0.009624	0.03994					0.0572977		4.83
4.84				0.009582	0.04198					0.060137		4.84
4.85				0.009541	0.04421					0.0632462		4.85
4.86				0.0095	0.04665					0.0666535		4.86
4.87				0.009459	0.04932					0.0703875		4.87
4.88				0.009419	0.05224					0.0744765		4.88
4.89				0.009379	0.05545					0.078977		4.89
4.9				0.009339	0.05895					0.0838893		4.9		0.00933886	0.05895		0.0838893
4.91				0.009299	0.06277					0.0892559		4.91
4.92				0.00926	0.06692					0.0950911		4.92
4.93				0.009221	0.07139					0.101381		4.93
4.94				0.009182	0.07619					0.108139		4.94
4.95				0.009143	0.08128					0.11531		4.95
4.96				0.009105	0.08663					0.122851		4.96
4.97				0.009067	0.0922					0.130705		4.97
4.98				0.009029	0.09792					0.138774		4.98
4.99				0.008991	0.1037					0.146929		4.99
5				0.008954	0.1096					0.155256		5
5.01				0.008916	0.1154					0.163444		5.01
5.02				0.00888	0.121					0.17135		5.02
5.03				0.008843	0.1265					0.179116		5.03
5.04				0.008806	0.1316					0.186319		5.04
5.05				0.00877	0.1362					0.192815		5.05
5.06				0.008734	0.1398					0.1979		5.06
5.07				0.008698	0.1413					0.200018		5.07		0.00869819	0.14128		0.199989
5.08				0.008663	0.1299					0.18391		5.08
5.09				0.008627	0.08777					0.124425		5.09
5.1				0.008592	0.07447					0.105666		5.1
5.11				0.008557	0.06587					0.0935464		5.11
5.12				0.008522	0.05946					0.0845199		5.12
5.13				0.008488	0.05438					0.0773719		5.13
5.14				0.008454	0.0502					0.0714951		5.14
5.15				0.00842	0.04666					0.0665222		5.15
5.16				0.008386	0.04362					0.0622554		5.16
5.17				0.008352	0.04097					0.0585392		5.17
5.18				0.008319	0.03864					0.0552748		5.18
5.19				0.008285	0.03656					0.0523632		5.19
5.2				0.008252	0.0347					0.0497622		5.2		0.00825223	0.0347		0.0497622
5.21				0.008219	0.03302					0.0474151		5.21
5.22				0.008187	0.0315					0.0452938		5.22
5.23				0.008154	0.03011					0.0433556		5.23
5.24				0.008122	0.02883					0.0415729		5.24
5.25				0.00809	0.02766					0.039945		5.25
5.26				0.008058	0.02658					0.0384438		5.26
5.27				0.008026	0.02558					0.0370552		5.27
5.28				0.007995	0.02465					0.0357654		5.28
5.29				0.007964	0.02379					0.0345739		5.29
5.3				0.007932	0.02298					0.0334526		5.3
5.31				0.007901	0.02223					0.0324156		5.31
5.32				0.007871	0.02152					0.0314352		5.32
5.33				0.00784	0.02085					0.0305108		5.33
5.34				0.00781	0.02023					0.0296564		5.34
5.35				0.007779	0.01963					0.0288303		5.35
5.36				0.007749	0.01907					0.0280602		5.36
5.37				0.00772	0.01855					0.027346		5.37
5.38				0.00769	0.01805					0.0266597		5.38
5.39				0.00766	0.01757					0.0260016		5.39
5.4				0.007631	0.01712					0.0253854		5.4
5.41				0.007602	0.01669					0.0247972		5.41
5.42				0.007573	0.01628					0.0242369		5.42
5.43				0.007544	0.01589					0.0237043		5.43
5.44				0.007515	0.01551					0.0231861		5.44
5.45				0.007487	0.01516					0.0227092		5.45
5.46				0.007458	0.01482					0.022246		5.46
5.47				0.00743	0.01449					0.0217974		5.47
5.48				0.007402	0.01418					0.021376		5.48
5.49				0.007374	0.01388					0.0209687		5.49
5.5				0.007347	0.01359					0.0205756		5.5		0.00734663	0.01359		0.0205755
5.51				0.007319	0.01331					0.020196		5.51
5.52				0.007292	0.01304					0.0198307		5.52
5.53				0.007264	0.01279					0.0194919		5.53
5.54				0.007237	0.01254					0.019154		5.54
5.55				0.00721	0.0123					0.0188299		5.55
5.56				0.007184	0.01207					0.0185197		5.56
5.57				0.007157	0.01185					0.0182227		5.57
5.58				0.007131	0.01163					0.0179267		5.58
5.59				0.007104	0.01143					0.0176566		5.59
5.6				0.007078	0.01123					0.0173875		5.6
5.61				0.007052	0.01103					0.0171188		5.61
5.62				0.007026	0.01085					0.0168763		5.62
5.63				0.007	0.01066					0.0166214		5.63
5.64				0.006975	0.01049					0.016393		5.64
5.65				0.006949	0.01032					0.0161646		5.65
5.66				0.006924	0.01015					0.015937		5.66
5.67				0.006899	0.009993					0.0157263		5.67
5.68				0.006874	0.009838					0.0155185		5.68
5.69				0.006849	0.009687					0.0153162		5.69
5.7				0.006824	0.00954					0.0151192		5.7
5.71				0.006799	0.009398					0.0149289		5.71
5.72				0.006775	0.009259					0.0147431		5.72
5.73				0.006751	0.009124					0.0145626		5.73
5.74				0.006726	0.008993					0.014387		5.74
5.75				0.006702	0.008865					0.014216		5.75
5.76				0.006678	0.008741					0.0140501		5.76
5.77				0.006654	0.00862					0.0138883		5.77
5.78				0.006631	0.008502					0.0137309		5.78
5.79				0.006607	0.008387					0.013577		5.79
5.8				0.006584	0.008274					0.0134264		5.8		0.00658363	0.00827441		0.0134267
5.81				0.00656	0.008165					0.0132804		5.81
5.82				0.006537	0.008058					0.0131375		5.82
5.83				0.006514	0.007954					0.0129986		5.83
5.84				0.006491	0.007853					0.0128636		5.84
5.85				0.006468	0.007753					0.01273		5.85
5.86				0.006445	0.007656					0.0126003		5.86
5.87				0.006423	0.007562					0.0124749		5.87
5.88				0.0064	0.007469					0.0123504		5.88
5.89				0.006378	0.007379					0.0122302		5.89
5.9				0.006356	0.00729					0.0121114		5.9
5.91				0.006334	0.007204					0.0119964		5.91
5.92				0.006312	0.007119					0.0118828		5.92
5.93				0.00629	0.007036					0.0117718		5.93
5.94				0.006268	0.006955					0.0116633		5.94
5.95				0.006246	0.006876					0.0115573		5.95
5.96				0.006225	0.006798					0.0114532		5.96
5.97				0.006203	0.006722					0.0113511		5.97
5.98				0.006182	0.006648					0.0112521		5.98
5.99				0.006161	0.006575					0.0111543		5.99
6				0.00614	0.006503					0.0110579		6

## Sheet: Data 3 4
					Rad effic Ratio					Rad effic Ratio																		Rad effic Ratio					Rad effic Ratio
		1st mode						3rd mode					Overall					Overall							1st mode						3rd mode					Overall					Overall						1st mode
		Amplitude Ratio						Amplitude Ratio					Amplitude Ratio					IL							Amplitude Ratio						Amplitude Ratio					Amplitude Ratio					IL						Amplitude Ratio
0.2	0.3562	0.3569			0.4445		0.2		0.007953	0.04938		0.356378	0.357077				12.4869	12.4699					0.2	0.5233	0.5253			1		0.2		0.01771	0.1111		0.523899	0.525897				5.62388	5.59076				0.2	0.4476	0.449
0.25	0.3603	0.3613			0.4445		0.25		0.007957	0.04938		0.360476	0.361475				12.3875	12.3635					0.25	0.527	0.5293			1		0.25		0.01772	0.1111		0.527595	0.529893				5.5627	5.52488				0.25	0.4516	0.4533
0.3	0.3654	0.3668			0.4446		0.3		0.007963	0.04938		0.365573	0.366973				12.2645	12.2313					0.3	0.5316	0.5343			1		0.3		0.01773	0.1111		0.532191	0.534888				5.48723	5.44323				0.3	0.4565	0.4587
0.35	0.3716	0.3739			0.4446		0.35		0.007969	0.04937		0.371771	0.37407				12.1183	12.0648					0.35	0.5372	0.5406			1		0.35		0.01775	0.1111		0.537786	0.541182				5.39623	5.34144				0.35	0.4625	0.4655
0.4	0.3846	0.3845			0.4446		0.4		0.007977	0.04937		0.384765	0.384665				11.8197	11.822					0.4	0.5436	0.5483			1		0.4		0.01776	0.111		0.54418	0.548875				5.29338	5.21862				0.4	0.4695	0.4744
0.45	0.3876	0.443			0.4447		0.45		0.007985	0.04937		0.387764	0.443144				11.7512	10.5909					0.45	0.5511	0.5585			1		0.45		0.01778	0.111		0.551673	0.559066				5.17439	5.05856				0.45	0.4893	0.4886
0.5	0.3968	0.7275			0.4448		0.5		0.007995	0.04936		0.396961	0.727588				11.5465	6.28158					0.5	0.5763	0.5749			1		0.5		0.0178	0.111		0.57685	0.575451				4.78611	4.80723				0.5	0.4871	0.548
0.55	0.4077				0.4448		0.55		0.008006	0.04936		0.407857					11.3112						0.55	0.5693	0.6313			1		0.55		0.01783	0.111		0.569858	0.631803				4.89223	3.99452				0.55	0.4988	0.7909
0.6	0.4211				0.4449		0.6		0.008018	0.04936		0.421253					11.0293						0.6	0.5905	0.8455			1		0.6		0.01785	0.1109		0.591039	0.845877				4.57472	1.4573				0.6	0.507
0.65	0.4363				0.445		0.65		0.00803	0.04935		0.436448					10.7204						0.65	0.5884				1		0.65		0.01788	0.1109		0.588943					4.60566					0.65	0.5208
0.7	0.4535				0.4451		0.7		0.008044	0.04935		0.453643					10.3836						0.7	0.6018				1		0.7		0.01791	0.1109		0.602333					4.4101					0.7	0.5363
0.75	0.4729				0.4452		0.75		0.00806	0.04934		0.473037					10.0188						0.75	0.6171				1		0.75		0.01795	0.1108		0.617622					4.19207					0.75	0.5535
0.8	0.4948				0.4453		0.8		0.008076	0.04934		0.494932					9.62462						0.8	0.6339				1		0.8		0.01798	0.1108		0.63441					3.95881					0.8	0.5726
0.85	0.5194				0.4454		0.85		0.008093	0.04933		0.519526					9.20223						0.85	0.6522				1		0.85		0.01802	0.1108		0.652698					3.71165					0.85	0.5936
0.9	0.5468				0.4455		0.9		0.008112	0.04932		0.54692					8.75474						0.9	0.6722				1		0.9		0.01806	0.1107		0.672685					3.44934					0.9	0.6168
0.95	0.5773				0.4456		0.95		0.008131	0.04932		0.577415					8.28233						0.95	0.694				1		0.95		0.0181	0.1107		0.694472					3.17216					0.95	0.6423
1	0.611				0.4457		1		0.008152	0.04931		0.611109					7.78858						1	0.7177				1		1		0.01815	0.1106		0.718159					2.88053					1	0.6703
1.05	0.6478				0.4458		1.05		0.008174	0.0493		0.647903					7.27963						1.05	0.7435				1		1.05		0.0182	0.1106		0.743945					2.5738					1.05	0.7007
1.1	0.6878				0.446		1.1		0.008198	0.04929		0.687898					6.75727						1.1	0.7713				1		1.1		0.01825	0.1105		0.771732					2.255					1.1	0.7336
1.15	0.7307				0.4461		1.15		0.008222	0.04929		0.730793					6.23077						1.15	0.8014				1		1.15		0.01831	0.1105		0.801818					1.92251					1.15	0.7692
1.2	0.7763				0.4463		1.2		0.008248	0.04928		0.776388					5.70303						1.2	0.8336				1		1.2		0.01836	0.1104		0.834004					1.58038					1.2	0.8072
1.25	0.8244				0.4464		1.25		0.008276	0.04927		0.824483					5.1799						1.25	0.868				1		1.25		0.01842	0.1104		0.868391					1.22917					1.25	0.8476
1.3	0.8744				0.4466		1.3		0.008305	0.04926		0.874479					4.66652						1.3	0.9046				1		1.3		0.01849	0.1103		0.904978					0.870468					1.3	0.8903
1.35	0.9262				0.4468		1.35		0.008335	0.04925		0.926275					4.1647						1.35	0.9433				1		1.35		0.01855	0.1102		0.943665					0.506633					1.35	0.9351
1.4	0.9793				0.4469		1.4		0.008366	0.04924		0.979371					3.67951						1.4	0.9841				1		1.4		0.01862	0.1102		0.984452					0.138873					1.4	0.9818
1.45	1.034				0.4471		1.45		0.0084	0.04923		1.03407					3.20548						1.45	1.027				1		1.45		0.01869	0.1101		1.02734					-0.231726					1.45	1.03
1.5	1.089				0.4473		1.5		0.008434	0.04922		1.08907					2.7534						1.5	1.071				1		1.5		0.01877	0.11		1.07133					-0.596083					1.5	1.08
1.55	1.144				0.4475		1.55		0.008471	0.04921		1.14406					2.3235						1.55	1.117				1		1.55		0.01885	0.11		1.11732					-0.961336					1.55	1.131
1.6	1.2				0.4477		1.6		0.008509	0.0492		1.20006					1.90646						1.6	1.165				1		1.6		0.01893	0.1099		1.16531					-1.32677					1.6	1.183
1.65	1.257				0.4479		1.65		0.008548	0.04918		1.25706					1.50144						1.65	1.213				1		1.65		0.01902	0.1098		1.2133					-1.67745					1.65	1.236
1.7	1.313			0.5857	0.4481		1.7		0.00859	0.04917		1.31306		0.585826			1.12092		8.13254				1.7	1.263				1		1.7		0.01911	0.1097		1.26329					-2.02829					1.7	1.289
1.75	1.37			0.4403	0.4483		1.75		0.008633	0.04916		1.37005		0.440469			0.749863		10.609				1.75	1.314				1		1.75		0.01921	0.1096		1.31428					-2.37211					1.75	1.343
1.8	1.427			0.3723	0.4486		1.8		0.008679	0.04915		1.42705		0.372502			0.392893		12.063				1.8	1.366				1		1.8		0.01931	0.1096		1.36627					-2.7092					1.8	1.397
1.85	1.483			0.3254	0.4488		1.85		0.008726	0.04913		1.48305		0.325634			0.0566156		13.2304				1.85	1.418				1		1.85		0.01941	0.1095		1.41827					-3.0337					1.85	1.452
1.9	1.54			0.2895	0.449		1.9		0.008775	0.04912		1.54005		0.289766			-0.272909		14.2437				1.9	1.471				1		1.9		0.01952	0.1094		1.47126					-3.35242					1.9	1.507
1.95	1.597			0.2607	0.4493		1.95		0.008826	0.0491		1.59705		0.260999			-0.591492		15.1507				1.95	1.525				1		1.95		0.01963	0.1093		1.52525					-3.66555					1.95	1.562			0.5423
2	1.654			0.2369	0.4495		2		0.00888	0.04909		1.65405		0.237233			-0.898034		15.9801				2	1.578				1		2		0.01975	0.1092		1.57825					-3.96229					2	1.618			0.4613
2.05	1.71			0.2167	0.4498		2.05		0.008936	0.04907		1.71005		0.217068			-1.19014		16.751				2.05	1.633				1		2.05		0.01987	0.1091		1.63324					-4.25986					2.05	1.673			0.4061
2.1	1.767			0.1993	0.45		2.1		0.008994	0.04906		1.76705		0.199705			-1.47688		17.4758				2.1	1.687				1		2.1		0.02	0.109		1.68724					-4.54243					2.1	1.729			0.364
2.15	1.824			0.1842	0.4503		2.15		0.009055	0.04904		1.82404		0.184645			-1.75554		18.1569				2.15	1.742			0.6387	1		2.15		0.02014	0.1089		1.74223		0.639335			-4.82109		3.89312			2.15	1.785			0.3299
2.2	1.88			0.1709	0.4506		2.2		0.009119	0.04903		1.88004		0.171386			-2.02109		18.8046				2.2	1.797			0.5445	1		2.2		0.02027	0.1088		1.79723		0.545254			-5.09108		5.27873			2.2	1.84			0.3016
2.25	1.937			0.1591	0.4509		2.25		0.009185	0.04901		1.93704		0.159629			-2.28342		19.4226				2.25	1.852			0.4816	1		2.25		0.02042	0.1087		1.85223		0.482465			-5.35293		6.34457			2.25	1.896			0.2774
2.3	1.993			0.1486	0.4512		2.3		0.009254	0.04899		1.99304		0.149175			-2.53386		20.0123				2.3	1.907			0.4336	1		2.3		0.02057	0.1086		1.90722		0.434575			-5.60712		7.25609			2.3	1.952			0.2565
2.35	2.05			0.1391	0.4515		2.35		0.009326	0.04898		2.05004		0.139724			-2.78167		20.5826				2.35	1.962			0.3948	1		2.35		0.02073	0.1085		1.96222		0.395887			-5.85409		8.06986			2.35	2.007			0.2381
2.4	2.106			0.1305	0.4518		2.4		0.009402	0.04896		2.10604		0.131176			-3.01865		21.1334				2.4	2.017			0.3624	1		2.4		0.0209	0.1084		2.01722		0.363603			-6.09422		8.81311			2.4	2.063			0.2219
2.45	2.163			0.1228	0.4521		2.45		0.009481	0.04894		2.16304		0.12353			-3.25349		21.6581				2.45	2.072			0.3346	1		2.45		0.02107	0.1083		2.07221		0.335924			-6.32789		9.50575			2.45	2.119			0.2074
2.5	2.219			0.1157	0.4524		2.5		0.009563	0.04892		2.21904		0.116488			-3.47839		22.1717				2.5	2.128			0.3105	1		2.5		0.02125	0.1081		2.12821		0.311951			-6.55953		10.1544			2.5	2.175			0.1944
2.55	2.276			0.1092	0.4527		2.55		0.009649	0.04891		2.27604		0.110049			-3.70157		22.6701				2.55	2.183			0.2892	1		2.55		0.02144	0.108		2.18321		0.290785			-6.78117		10.7709			2.55	2.231			0.1826
2.6	2.333			0.1033	0.453		2.6		0.009739	0.04889		2.33304		0.104214			-3.91929		23.1487				2.6	2.239			0.2703	1		2.6		0.02163	0.1079		2.23921		0.272025			-7.00117		11.3571			2.6	2.287			0.1719
2.65	2.389			0.09778	0.4534		2.65		0.009834	0.04887		2.38904		0.0987641			-4.12915		23.6207				2.65	2.294			0.2534	1		2.65		0.02184	0.1078		2.29421		0.255275			-7.21195		11.9169			2.65	2.343			0.1622
2.7	2.445			0.09272	0.4537		2.7		0.009933	0.04885		2.44504		0.0937781			-4.33328		24.0781				2.7	2.35			0.2381	1		2.7		0.02206	0.1077		2.35021		0.240135			-7.42144		12.4568			2.7	2.399			0.1532
2.75	2.502			0.08803	0.4541		2.75		0.01004	0.04883		2.50204		0.0891677			-4.53728		24.5237				2.75	2.406			0.2242	1		2.75		0.02228	0.1075		2.40621		0.226403			-7.62599		12.9781			2.75	2.455			0.145
2.8	2.558			0.08367	0.4544		2.8		0.01014	0.04881		2.55804		0.08489			-4.73241		24.9605				2.8	2.461			0.2116	1		2.8		0.02252	0.1074		2.46121		0.213983			-7.82231		13.4791			2.8	2.511			0.1374
2.85	2.614			0.07962	0.4548		2.85		0.01026	0.04879		2.61404		0.0809313			-4.92433		25.3859				2.85	2.517			0.2	1		2.85		0.02277	0.1073		2.51721		0.202576			-8.01774		13.9673			2.85	2.567			0.1304
2.9	2.67			0.07584	0.4552		2.9		0.01038	0.04876		2.67004		0.0772476			-5.11226		25.8026				2.9	2.573			0.1894	1		2.9		0.02303	0.1071		2.57321		0.19218			-8.20887		14.4387			2.9	2.623			0.1239
2.95	2.725			0.07231	0.4555		2.95		0.0105	0.04874		2.72504		0.0738189			-5.29223		26.2116				2.95	2.629			0.1796	1		2.95		0.02331	0.107		2.62921		0.1826			-8.39588		14.8982			2.95	2.679			0.1179
3	2.779			0.069	0.4559		3		0.01064	0.04872		2.77904		0.0706217			-5.46648		26.6123				3	2.685			0.1705	1		3		0.02359	0.1069		2.68521		0.173733			-8.57896		15.3478			3	2.735			0.1123
3.05				0.0659	0.4563		3.05		0.01078	0.0487				0.0676404					27.0051				3.05	2.741			0.162	1		3.05		0.0239	0.1067		2.74121		0.165488			-8.75825		15.7896			3.05	2.791			0.107
3.1				0.06299	0.4567		3.1		0.01092	0.04868				0.0648555					27.3905				3.1	2.797			0.1542	1		3.1		0.02422	0.1066		2.79721		0.157958			-8.93392		16.2155			3.1	2.847			0.1021
3.15				0.06024	0.4571		3.15		0.01108	0.04865				0.0622446					27.771				3.15	2.853			0.1469	1		3.15		0.02455	0.1064		2.85321		0.150947			-9.1061		16.6338			3.15	2.903			0.09749
3.2				0.05766	0.4575		3.2		0.01124	0.04863				0.059811					28.1437				3.2	2.909			0.1401	1		3.2		0.02491	0.1063		2.90921		0.144461			-9.27494		17.0421			3.2	2.959			0.09316
3.25				0.05522	0.4579		3.25		0.01141	0.04861				0.0575293					28.5112				3.25	2.965			0.1337	1		3.25		0.02529	0.1061		2.96522		0.138401			-9.44056		17.4445			3.25	3.015			0.08909
3.3				0.05291	0.4584		3.3		0.0116	0.04858				0.0553948					28.8728				3.3	3.021			0.1277	1		3.3		0.02569	0.106		3.02122		0.132768			-9.60308		17.8391			3.3	3.07			0.08524
3.35				0.05073	0.4588		3.35		0.01179	0.04856				0.0533998					29.2291				3.35	3.077			0.122	1		3.35		0.02611	0.1058		3.07722		0.127466			-9.76262		18.2309			3.35	3.125			0.08162
3.4				0.04866	0.4592		3.4		0.012	0.04853				0.0515344					29.5811				3.4	3.133			0.1167	1		3.4		0.02656	0.1057		3.13323		0.122596			-9.91927		18.6113			3.4	3.179			0.0782
3.45				0.0467	0.4597		3.45		0.01222	0.04851				0.049795					29.9266				3.45	3.189			0.1117	1		3.45		0.02704	0.1055		3.18923		0.118064			-10.0732		18.9856			3.45				0.07495
3.5				0.04483	0.4601		3.5		0.01245	0.04848				0.0481636					30.2701				3.5	3.245			0.1069	1		3.5		0.02755	0.1054		3.24523		0.113779			-10.2244		19.3601			3.5				0.07188
3.55				0.04306	0.4606		3.55		0.0127	0.04846				0.0466556					30.6065				3.55	3.301			0.1025	1		3.55		0.02809	0.1052		3.30124		0.109929			-10.373		19.7174			3.55				0.06897
3.6				0.04137	0.4611		3.6		0.01297	0.04843				0.0452539					30.9396				3.6	3.356			0.09823	1		3.6		0.02867	0.105		3.35624		0.106269			-10.5165		20.0781			3.6				0.0662
3.65				0.03977	0.4615		3.65		0.01326	0.0484				0.0439694					31.2671				3.65	3.411			0.0942	1		3.65		0.02929	0.1049		3.41125		0.102905			-10.6577		20.4318			3.65				0.06357
3.7				0.03823	0.462		3.7		0.01357	0.04838				0.0427764					31.5924				3.7	3.466			0.09038	1		3.7		0.02996	0.1047		3.46626		0.0998186			-10.7966		20.7798			3.7				0.06106
3.75				0.03677	0.4625		3.75		0.01391	0.04835				0.0417014					31.911				3.75	3.519			0.08675	1		3.75		0.03068	0.1045		3.51927		0.0969953			-10.9285		21.1225			3.75				0.05867
3.8				0.03537	0.463		3.8		0.01427	0.04832				0.0407223					32.2264				3.8	3.569			0.0833	1		3.8		0.03146	0.1044		3.56928		0.094437			-11.051		21.4596			3.8				0.0564
3.85				0.03403	0.4635		3.85		0.01466	0.04829				0.0398481					32.5375				3.85				0.08	1		3.85		0.0323	0.1042				0.0921226					21.7931			3.85				0.05422
3.9				0.03275	0.464		3.9		0.01509	0.04826				0.0390894					32.8429				3.9				0.07686	1		3.9		0.03322	0.104				0.0900811					22.1204			3.9				0.05214
3.95				0.03153	0.4645		3.95		0.01556	0.04823				0.0384496					33.1414				3.95				0.07386	1		3.95		0.03422	0.1038				0.0883024					22.4425			3.95				0.05015
4				0.03035	0.465		4		0.01607	0.0482				0.0379159					33.4369				4				0.07099	1		4		0.03531	0.1037				0.0867938					22.7587			4				0.04825
4.05				0.02922	0.4655		4.05		0.01664	0.04817				0.0375178					33.7251				4.05				0.06825	1		4.05		0.03651	0.1035				0.0855805					23.068			4.05				0.04642
4.1				0.02814	0.4661		4.1		0.01726	0.04814				0.0372515					34.0037				4.1				0.06563	1		4.1		0.03784	0.1033				0.0846819					23.3695			4.1				0.04467
4.15				0.0271	0.4666		4.15		0.01796	0.04811				0.0371421					34.2746				4.15				0.06311	1		4.15		0.03931	0.1031				0.0841037					23.6638			4.15				0.04299
4.2				0.02609	0.4672		4.2		0.01874	0.04808				0.0371896					34.5372				4.2				0.0607	1		4.2		0.04096	0.1029				0.0839043					23.9472			4.2				0.04138
4.25				0.02513	0.4677		4.25		0.01963	0.04805				0.0374458					34.7835				4.25				0.05838	1		4.25		0.0428	0.1027				0.0840946					24.2199			4.25				0.03983
4.3				0.0242	0.4683		4.3		0.02063	0.04802				0.0379056					35.0151				4.3				0.05615	1		4.3		0.04488	0.1025				0.0847423					24.4785			4.3				0.03834
4.35				0.02331	0.4689		4.35		0.02179	0.04799				0.0386389					35.2237				4.35				0.05401	1		4.35		0.04725	0.1024				0.0859198					24.7182			4.35				0.0369
4.4				0.02244	0.4694		4.4		0.02312	0.04796				0.0396563					35.4115				4.4				0.05196	1		4.4		0.04997	0.1022				0.0877146					24.9346			4.4				0.03552
4.45				0.02161	0.47		4.45		0.02469	0.04792				0.0410632					35.561				4.45				0.04997	1		4.45		0.05312	0.102				0.0902246					25.1249			4.45				0.03418
4.5				0.02081	0.4706		4.5		0.02655	0.04789				0.0429286					35.6653				4.5				0.04806	1		4.5		0.05681	0.1018				0.093619					25.277			4.5				0.03289
4.55				0.02003	0.4712		4.55		0.02879	0.04786				0.0453754					35.7124				4.55				0.04622	1		4.55		0.06116	0.1016				0.0980682					25.3815			4.55				0.03165
4.6				0.01928	0.4718		4.6		0.03154	0.04782				0.0485928					35.6781				4.6				0.04444	1		4.6		0.06636	0.1014				0.103837					25.4242			4.6				0.03045
4.65				0.01855	0.4724		4.65		0.035	0.04779				0.0528593					35.534				4.65				0.04273	1		4.65		0.07266	0.1012				0.111287					25.3844			4.65				0.02929
4.7				0.01785	0.473		4.7		0.03945	0.04775				0.0585767					35.2384				4.7				0.04107	1		4.7		0.08035	0.101				0.120826					25.242			4.7				0.02817
4.75				0.01716	0.4737		4.75		0.04534	0.04772				0.0663769					34.7407				4.75				0.03947	1		4.75		0.08985	0.1007				0.133056					24.9706			4.75				0.02708
4.8				0.0165	0.4743		4.8		0.0534	0.04768				0.0773005					33.968				4.8				0.03792	1		4.8		0.1016	0.1005				0.148604					24.5435			4.8				0.02603
4.85				0.01586	0.4749		4.85		0.06473	0.04765				0.0929058					32.8503				4.85				0.03641	1		4.85		0.116	0.1003				0.168041					23.9524			4.85				0.02501
4.9				0.01524	0.4756		4.9		0.08079	0.04761				0.115266					31.3551				4.9				0.03496	1		4.9		0.1332	0.1001				0.19159					23.211			4.9				0.02402
4.95				0.01464	0.4762		4.95		0.1025	0.04758				0.145694					29.5788				4.95				0.03355	1		4.95		0.153	0.0999				0.21896					22.3637			4.95				0.02306
5				0.01405	0.4769		5		0.1288	0.04754				0.182692					27.769				5				0.03218	1		5		0.1747	0.09968				0.24915					21.4752			5				0.02213
5.05				0.01348	0.4776		5.05		0.1564	0.0475				0.221593					26.1788				5.05				0.03086	1		5.05		0.1974	0.09947				0.280866					20.6026			5.05				0.02123
5.1				0.01293	0.4783		5.1		0.1824	0.04747				0.258276					24.8964				5.1				0.02957	1		5.1		0.2204	0.09925				0.313092					19.7812			5.1				0.02035
5.15				0.01239	0.4789		5.15		0.07964	0.04743				0.113307					31.7059				5.15				0.02831	1		5.15		0.243	0.09903				0.344818					19.032			5.15				0.01949
5.2				0.01186	0.4796		5.2		0.05316	0.04739				0.0761093					34.7456				5.2				0.0271	1		5.2		0.265	0.0988				0.375745					18.3532			5.2				0.01866
5.25				0.01135	0.4803		5.25		0.04032	0.04735				0.0581397					36.6589				5.25				0.02591	1		5.25	0.1135	0.2862	0.09858				0.405576	0.162591				17.7415	24.9333		5.25				0.01785
5.3				0.01086	0.481		5.3		0.03227	0.04731				0.046911					38.0894				5.3				0.02476	1		5.3	0.08066	0.3064	0.09835				0.434022	0.116727				17.1943	27.229		5.3				0.01707
5.35				0.01037	0.4818		5.35		0.02666	0.04727				0.039103					39.2443				5.35				0.02364	1		5.35	0.06411	0.3255	0.09813				0.460933	0.0936965				16.7055	28.6471		5.35				0.0163
5.4				0.009896	0.4825		5.4		0.02251	0.04723				0.0333366					40.2175				5.4				0.02254	1		5.4	0.05309	0.3425	0.0979				0.484892	0.078391				16.2936	29.7473		5.4				0.01555
5.45				0.009433	0.4832		5.45		0.0193	0.04719				0.0288784					41.0706				5.45				0.02148	1		5.45	0.04501		0.09767					0.0671803					30.6695		5.45				0.01482
5.5				0.008981	0.484		5.5		0.01675	0.04715				0.0253334					41.8379				5.5				0.02044	1		5.5	0.03877		0.09744					0.0585151					31.483		5.5				0.0141
5.55				0.008539	0.4847		5.55		0.01466	0.04711				0.022422					42.55				5.55				0.01942	1		5.55	0.03376		0.0972					0.0515423					32.2279		5.55				0.01341
5.6				0.008107	0.4854		5.6		0.01293	0.04707				0.0200023					43.2202				5.6				0.01843	1		5.6	0.02965		0.09697					0.0458029					32.9229		5.6				0.01273
5.65				0.007685	0.4862		5.65		0.01146	0.04703				0.0179366					43.865				5.65				0.01746	1		5.65	0.02621		0.09673					0.0409729					33.5877		5.65				0.01206
5.7				0.007271	0.487		5.7		0.0102	0.04699				0.0161539					44.4948				5.7				0.01651	1		5.7	0.02327		0.09649					0.036818					34.2357		5.7				0.01141
5.75				0.006866	0.4878		5.75		0.009107	0.04695				0.0145951					45.1168				5.75				0.01558	1		5.75	0.02074		0.09625					0.0332119					34.874		5.75				0.01077
5.8				0.00647	0.4885		5.8		0.008149	0.04691				0.0132164					45.7383				5.8				0.01468	1		5.8	0.01853		0.09601					0.030037					35.5062		5.8				0.01015
5.85				0.006081	0.4893		5.85		0.007302	0.04686				0.011984					46.3656				5.85				0.01379	1		5.85	0.01658		0.09577					0.0272021					36.1472		5.85				0.009533
5.9				0.005699	0.4901		5.9		0.006547	0.04682				0.0108722					47.0046				5.9				0.01291	1		5.9	0.01485		0.09553					0.0246518					36.8027		5.9				0.008933
5.95				0.005324	0.4909		5.95		0.005869	0.04678				0.0098608					47.6606				5.95				0.01206	1		5.95	0.01329		0.09528					0.0223314					37.469		5.95				0.008344
6				0.004957	0.4917		6		0.005257	0.04673				0.00893554					48.3372				6				0.01122	1		6	0.01189		0.09503					0.0202147					38.16		6				0.007766
6.05				0.004595	0.4926		6.05		0.0047	0.04669				0.00808047					49.0436				6.05				0.0104	1		6.05	0.01063		0.09479					0.0182799					38.8746		6.05				0.007199
6.1				0.00424	0.4934		6.1		0.004192	0.04664				0.00728858					49.7842				6.1				0.00959	1		6.1	0.009468		0.09454					0.0164698					39.629		6.1				0.006641
6.15				0.00389	0.4942		6.15		0.003726	0.0466				0.00654968					50.5689				6.15				0.008796	1		6.15	0.008407		0.09429					0.0147894					40.424		6.15				0.006092
6.2				0.003546	0.4951		6.2		0.003296	0.04656				0.00585674					51.4044				6.2				0.008015	1		6.2	0.00743		0.09404					0.0132155					41.2713		6.2				0.005552
6.25				0.003208	0.4959		6.25		0.002898	0.04651				0.00520462					52.3028				6.25				0.007246	1		6.25	0.006526		0.09378					0.0117338					42.183		6.25				0.005021
6.3				0.002874	0.4968		6.3		0.002528	0.04646				0.0045871					53.2815				6.3				0.006489	1		6.3	0.005687		0.09353					0.010334					43.1734		6.3				0.004498
6.35				0.002545	0.4977		6.35		0.002183	0.04642				0.004001					54.358				6.35				0.005744	1		6.35	0.004905		0.09327					0.0090062					44.2618		6.35				0.003982
6.4				0.00222	0.4985		6.4		0.001861	0.04637				0.00344312					55.5627				6.4				0.005009	1		6.4	0.004173		0.09302					0.00774067					45.4776		6.4				0.003473
6.45				0.0019	0.4994		6.45		0.001558	0.04633				0.00290942					56.9298				6.45				0.004284	1		6.45	0.003487		0.09276					0.0065323					46.8596		6.45				0.002971
6.5				0.001583	0.5003		6.5		0.001274	0.04628				0.00239834					58.5266				6.5				0.003569	1		6.5	0.002841		0.0925					0.00537404					48.4677		6.5				0.002476
6.55				0.00127	0.5012		6.55		0.001007	0.04623				0.00190814					60.4472				6.55				0.002863	1		6.55	0.00223		0.09224					0.00425941					50.4028		6.55				0.001986
6.6				0.000961	0.5021		6.6		0.0007552	0.04619				0.00143672					62.8702				6.6				0.002165	1		6.6	0.001653		0.09198					0.00318623					52.8484		6.6				0.001502
6.65				0.0006549	0.5031		6.65		0.0005206	0.04614				0.000985364					66.1837				6.65				0.001475	1		6.65	0.001104		0.09171					0.00214785					56.1994		6.65				0.001024
6.7				0.0003519	0.504		6.7		0.0003102	0.04609				0.000562389					71.4702				6.7				0.0007922	1		6.7	0.0005822		0.09145					0.00114258					61.6142		6.7				0.00055
6.75				5.178e-05	0.5049		6.75		0.0001722	0.04604				0.000248972					83.889				6.75				0.0001165	1		6.75	8.412e-05		0.09119					0.000166507					78.279		6.75				8.091e-05
6.8				0.0002458	0.5059		6.8		0.0002402	0.04599				0.000419297					74.4524				6.8				0.0005528	1		6.8	0.0003923		0.09092					0.00078319					64.7681		6.8				0.0003839
6.85				0.0005409	0.5068		6.85		0.0004109	0.04594				0.000793883					67.8572				6.85				0.001216	1		6.85	0.000849		0.09065					0.00170888					57.9335		6.85				0.0008449
6.9				0.0008338	0.5078		6.9		0.0005946	0.04589				0.0011842					64.14				6.9				0.001874	1		6.9	0.001288		0.09039					0.00261338					54.1887		6.9				0.001302
6.95				0.001125	0.5087		6.95		0.000777	0.04585				0.0015726					61.5541				6.95				0.002527	1		6.95	0.001711		0.09012					0.00349868					51.6031		6.95				0.001756
7				0.001414	0.5097		7		0.0009551	0.0458				0.00195546					59.5756				7				0.003175	1		7	0.002118		0.08985					0.00436491					49.631		7				0.002207
	Soure panel vib Amp/thickness = 0.2
	wP/wc =	1.93
	wP1/wc =	No			Rad effic Ratio					Rad effic Ratio
		1st mode						3rd mode					Overall					Overall
		Amplitude Ratio						Amplitude Ratio					Amplitude Ratio					IL
	1st solution	2nd	3rd	4th				1st solution	2nd			1st solution	2nd	4th A	4th B		1st solution	2nd	4th A	4th B
0.2	0.07666				0.4445		0.2		0.001591	0.04938		0.076693					11.8501
0.25	0.07776				0.4445		0.25		0.001592	0.04938		0.0777926					11.7264
0.3	0.07914				0.4446		0.3		0.001593	0.04938		0.0791721					11.5726
0.35	0.08083				0.4446		0.35		0.001594	0.04937		0.0808614					11.3891
0.4	0.08289				0.4446		0.4		0.001596	0.04937		0.0829207					11.1705
0.45	0.08533				0.4447		0.45		0.001597	0.04937		0.0853599					10.9176
0.5	0.08825				0.4448		0.5		0.001599	0.04936		0.088279					10.6243
0.55	0.09172				0.4448		0.55		0.001601	0.04936		0.0917479					10.2894
0.6	0.09585				0.4449		0.6		0.001604	0.04936		0.0958768					9.90586
0.65	0.1008				0.445		0.65		0.001606	0.04935		0.100826					9.46754
0.7	0.1067				0.4451		0.7		0.001609	0.04935		0.106724					8.97252
0.75	0.1139				0.4452		0.75		0.001612	0.04934		0.113923					8.40438
0.8	0.1226				0.4453		0.8		0.001615	0.04934		0.122621					7.7641
0.85	0.1335				0.4454		0.85		0.001619	0.04933		0.13352					7.02333
0.9	0.1473				0.4455		0.9		0.001622	0.04932		0.147318					6.16795
0.95	0.1651				0.4456		0.95		0.001626	0.04932		0.165116					5.17611
1	0.1884				0.4457		1		0.001631	0.04931		0.188414					4.02848
1.05	0.2198				0.4458		1.05		0.001635	0.0493		0.219812					2.68859
1.1	0.2622				0.446		1.1		0.00164	0.04929		0.26221					1.15456
1.15	0.3186				0.4461		1.15		0.001645	0.04929		0.318608					-0.538663
1.2	0.3895				0.4463		1.2		0.00165	0.04928		0.389507					-2.28584
1.25	0.471				0.4464		1.25		0.001655	0.04927		0.471006					-3.93707
1.3	0.5571				0.4466		1.3		0.001661	0.04926		0.557105					-5.39726
1.35	0.6435				0.4468		1.35		0.001667	0.04925		0.643504					-6.65151
1.4	0.7278				0.4469		1.4		0.001673	0.04924		0.727804					-7.72175
1.45	0.8095			0.2525	0.4471		1.45		0.00168	0.04923		0.809503		0.252511			-8.64779		1.47128
1.5	0.8886			0.1816	0.4473		1.5		0.001687	0.04922		0.888603		0.181616			-9.45952		4.33221
1.55	0.9651			0.1439	0.4475		1.55		0.001694	0.04921		0.965103		0.14392			-10.1788		6.35132
1.6	1.04			0.1191	0.4477		1.6		0.001702	0.0492		1.04		0.119124			-10.8299		7.9923
1.65	1.112			0.1013	0.4479		1.65		0.00171	0.04918		1.112		0.101329			-11.4133		9.39633
1.7	1.183			0.08781	0.4481		1.7		0.001718	0.04917		1.183		0.0878436			-11.9528		10.6356
1.75	1.253			0.0772	0.4483		1.75		0.001727	0.04916		1.253		0.0772386			-12.4541		11.7521
1.8	1.321			0.06865	0.4486		1.8		0.001736	0.04915		1.321		0.0686939			-12.9161		12.7686
1.85	1.388			0.0616	0.4488		1.85		0.001745	0.04913		1.388		0.0616494			-13.3477		13.7077
1.9	1.453			0.0557	0.449		1.9		0.001755	0.04912		1.453		0.0557553			-13.7472		14.5801
1.95	1.513			0.05069	0.4493		1.95		0.001765	0.0491		1.513		0.0507514			-14.1015		15.3956
2				0.04638	0.4495		2		0.001776	0.04909				0.046448					16.1653
2.05				0.04264	0.4498		2.05		0.001787	0.04907				0.0427148					16.8924
2.1				0.03936	0.45		2.1		0.001799	0.04906				0.0394421					17.5854
2.15				0.03648	0.4503		2.15		0.001811	0.04904				0.0365698					18.2422
2.2				0.03391	0.4506		2.2		0.001824	0.04903				0.034008					18.8734
2.25				0.03162	0.4509		2.25		0.001837	0.04901				0.0317265					19.4774
2.3				0.02956	0.4512		2.3		0.001851	0.04899				0.0296757					20.0591
2.35				0.0277	0.4515		2.35		0.001866	0.04898				0.0278254					20.6202
2.4				0.02602	0.4518		2.4		0.001881	0.04896				0.0261556					21.1601
2.45				0.02448	0.4521		2.45		0.001896	0.04894				0.0246264					21.6864
2.5				0.02308	0.4524		2.5		0.001913	0.04892				0.023238					22.1942
2.55				0.0218	0.4527		2.55		0.00193	0.04891				0.0219702					22.686
2.6				0.02062	0.453		2.6		0.001948	0.04889				0.0208032					23.1655
2.65				0.01953	0.4534		2.65		0.001967	0.04887				0.0197271					23.6323
2.7				0.01852	0.4537		2.7		0.001987	0.04885				0.018732					24.0893
2.75				0.01759	0.4541		2.75		0.002008	0.04883				0.0178178					24.5316
2.8				0.01672	0.4544		2.8		0.002029	0.04881				0.0169644					24.9678
2.85				0.01591	0.4548		2.85		0.002052	0.04879				0.0161725					25.3935
2.9				0.01516	0.4552		2.9		0.002076	0.04876				0.0154417					25.8072
2.95				0.01445	0.4555		2.95		0.002101	0.04874				0.0147523					26.2188
3				0.01379	0.4559		3		0.002128	0.04872				0.0141146					26.6186
3.05				0.01318	0.4563		3.05		0.002156	0.0487				0.0135281					27.0051
3.1				0.01259	0.4567		3.1		0.002185	0.04868				0.0129637					27.396
3.15				0.01205	0.4571		3.15		0.002216	0.04865				0.0124509					27.7696
3.2				0.01153	0.4575		3.2		0.002249	0.04863				0.0119606					28.1451
3.25				0.01104	0.4579		3.25		0.002283	0.04861				0.0115024					28.5143
3.3				0.01058	0.4584		3.3		0.00232	0.04858				0.0110771					28.8744
3.35				0.01014	0.4588		3.35		0.002359	0.04856				0.0106747					29.2341
3.4				0.009731	0.4592		3.4		0.002401	0.04853				0.0103064					29.5819
3.45				0.009339	0.4597		3.45		0.002445	0.04851				0.00995856					29.9275
3.5				0.008966	0.4601		3.5		0.002492	0.04848				0.00963376					30.27
3.55				0.008612	0.4606		3.55		0.002542	0.04846				0.00933221					30.6064
3.6				0.008275	0.4611		3.6		0.002596	0.04843				0.00905285					30.9384
3.65				0.007953	0.4615		3.65		0.002654	0.0484				0.00879418					31.268
3.7				0.007647	0.462		3.7		0.002716	0.04838				0.00855745					31.5911
3.75				0.007354	0.4625		3.75		0.002783	0.04835				0.00834095					31.9109
3.8				0.007074	0.463		3.8		0.002856	0.04832				0.00814585					32.2262
3.85				0.006807	0.4635		3.85		0.002934	0.04829				0.00797195					32.536
3.9				0.006551	0.464		3.9		0.00302	0.04826				0.00782026					32.8414
3.95				0.006305	0.4645		3.95		0.003114	0.04823				0.00769071					33.1424
4				0.00607	0.465		4		0.003217	0.0482				0.00758572					33.4365
4.05				0.005844	0.4655		4.05		0.003331	0.04817				0.00750623					33.7246
4.1				0.005628	0.4661		4.1		0.003457	0.04814				0.00745494					34.0028
4.15				0.005419	0.4666		4.15		0.003597	0.04811				0.00743252					34.2751
4.2				0.005219	0.4672		4.2		0.003755	0.04808				0.00744567					34.5341
4.25				0.005026	0.4677		4.25		0.003933	0.04805				0.00749651					34.7818
4.3				0.00484	0.4683		4.3		0.004136	0.04802				0.00759201					35.0124
4.35				0.004661	0.4689		4.35		0.004369	0.04799				0.00773959					35.222
4.4				0.004489	0.4694		4.4		0.004639	0.04796				0.00794932					35.4049
4.45				0.004322	0.47		4.45		0.004957	0.04792				0.0082355					35.5539
4.5				0.004161	0.4706		4.5		0.005336	0.04789				0.00861741					35.6563
4.55				0.004006	0.4712		4.55		0.005795	0.04786				0.00912207					35.6959
4.6				0.003856	0.4718		4.6		0.006363	0.04782				0.00979001					35.6514
4.65				0.00371	0.4724		4.65		0.007083	0.04779				0.0106818					35.4909
4.7				0.003569	0.473		4.7		0.008026	0.04775				0.0118984					35.1653
4.75				0.003433	0.4737		4.75		0.009311	0.04772				0.0136079					34.6039
4.8				0.003301	0.4743		4.8		0.01116	0.04768				0.0161241					33.7046
4.85				0.003173	0.4749		4.85		0.01401	0.04765				0.0200656					32.3124
4.9				0.003049	0.4756		4.9		0.01887	0.04761				0.0268598					30.1856
4.95				0.002928	0.4762		4.95		0.028	0.04758				0.0397061					27.0615
5				0.002811	0.4769		5		0.04192	0.04754				0.0593504					23.6944
5.05				0.002697	0.4776		5.05	0.03537		0.0475					0.0500934					25.1455
5.1				0.002586	0.4783		5.1	0.02078		0.04747					0.0295009					29.5669
5.15				0.002478	0.4789		5.15	0.01386		0.04743					0.019757					32.7648
5.2				0.002373	0.4796		5.2	0.01016		0.04739					0.014563					35.0569
5.25				0.002271	0.4803		5.25	0.007901		0.04735					0.0114022					36.7836
5.3				0.002171	0.481		5.3	0.006384		0.04731					0.0092857					38.1507
5.35				0.002074	0.4818		5.35	0.005298		0.04727					0.00777426					39.2756
5.4				0.001979	0.4825		5.4	0.004484		0.04723					0.00664296					40.2354
5.45				0.001887	0.4832		5.45	0.00385		0.04719					0.00576244					41.0797
5.5				0.001796	0.484		5.5	0.003343		0.04715					0.00505736					41.8458
5.55				0.001708	0.4847		5.55	0.002928		0.04711					0.00447924					42.5536
5.6				0.001622	0.4854		5.6	0.002583		0.04707					0.00399683					43.2214
5.65				0.001537	0.4862		5.65	0.00229		0.04703					0.00358477					43.8673
5.7				0.001454	0.487		5.7	0.002038		0.04699					0.00322816					44.498
5.75				0.001373	0.4878		5.75	0.00182		0.04695					0.00291718					45.1194
5.8				0.001294	0.4885		5.8	0.001629		0.04691					0.00264229					45.7393
5.85				0.001216	0.4893		5.85	0.001459		0.04686					0.002395					46.3686
5.9				0.00114	0.4901		5.9	0.001308		0.04682					0.00217286					47.0053
5.95				0.001065	0.4909		5.95	0.001173		0.04678					0.00197132					47.6604
6				0.0009914	0.4917		6	0.00105		0.04673					0.00178546					48.3393
6.05				0.0009191	0.4926		6.05	0.0009389		0.04669					0.00161487					49.0445
6.1				0.000848	0.4934		6.1	0.0008372		0.04664					0.00145634					49.7862
6.15				0.0007781	0.4942		6.15	0.0007439		0.0466					0.00130852					50.5702
6.2				0.0007093	0.4951		6.2	0.0006578		0.04656					0.00116983					51.4059
6.25				0.0006415	0.4959		6.25	0.0005781		0.04651					0.00103919					52.3069
6.3				0.0005748	0.4968		6.3	0.000504		0.04646					0.000915657					53.285
6.35				0.000509	0.4977		6.35	0.0004349		0.04642					0.000798346					54.3621
6.4				0.000444	0.4985		6.4	0.0003701		0.04637					0.000686356					55.5683
6.45				0.0003799	0.4994		6.45	0.0003094		0.04633					0.000579466					56.9387
6.5				0.0003166	0.5003		6.5	0.0002521		0.04628					0.000476806					58.5364
6.55				0.0002541	0.5012		6.55	0.000198		0.04623					0.00037812					60.4593
6.6				0.0001922	0.5021		6.6	0.0001468		0.04619					0.000282916					62.8948
6.65				0.000131	0.5031		6.65	9.81e-05		0.04614					0.000190809					66.2334
6.7				7.039e-05	0.504		6.7	5.174e-05		0.04609					0.000101532					71.6368
6.75				1.036e-05	0.5049		6.75	7.478e-06		0.04604					1.48044e-05					88.2871
6.8				4.915e-05	0.5059		6.8	3.488e-05		0.04599					6.96344e-05					74.769
6.85				0.0001082	0.5068		6.85	7.551e-05		0.04594					0.000152022					67.9202
6.9				0.0001668	0.5078		6.9	0.0001146		0.04589					0.000232569					64.1642
6.95				0.0002249	0.5087		6.95	0.0001522		0.04585					0.000311303					61.5717
7				0.0002828	0.5097		7	0.0001885		0.0458					0.000388639					59.5843
	Soure panel vib Amp/thickness = 3
	wP/wc =	4.08
	wP1/wc =	0.92			Rad effic Ratio					Rad effic Ratio
		1st mode						3rd mode					Overall					Overall
		Amplitude Ratio						Amplitude Ratio					Amplitude Ratio					IL
	1st solution	2nd	3rd	4th				1st solution	2nd			1st solution	2nd	4th A	4th B		1st solution	2nd	4th A	4th B
0.2	0.8135	0.83			0.4445		0.2		0.02384	0.04938		0.814198	0.830684				14.8557	14.6813
0.25	0.8186	0.8372			0.4445		0.25		0.02385	0.04938		0.819295	0.837879				14.8015	14.6063
0.3	0.8249	0.8467			0.4446		0.3		0.02387	0.04938		0.82559	0.847373				14.7339	14.5074
0.35	0.8323	0.8593			0.4446		0.35		0.02389	0.04937		0.832985	0.859964				14.6563	14.3791
0.4	0.841	0.8764			0.4446		0.4		0.02391	0.04937		0.841679	0.877052				14.566	14.208
0.45	0.9183	0.9017			0.4447		0.45		0.02394	0.04937		0.918924	0.902335				13.8014	13.9598
0.5	1.017	0.9438			0.4448		0.5		0.02397	0.04936		1.01756	0.944409				12.9138	13.5626
0.55	0.8746	1.02			0.4448		0.55		0.024	0.04936		0.875258	1.02056				14.2239	12.8882
0.6	0.8885	1.142			0.4449		0.6		0.02404	0.04936		0.88915	1.14251				14.0859	11.9061
0.65	0.8849				0.445		0.65		0.02407	0.04935		0.885554					14.1202
0.7	0.8975				0.4451		0.7		0.02412	0.04935		0.898148					13.9965
0.75	0.9169				0.4452		0.75		0.02416	0.04934		0.917536					13.8098
0.8	0.9382				0.4453		0.8		0.02421	0.04934		0.938825					13.6093
0.85	0.9607				0.4454		0.85		0.02426	0.04933		0.961312					13.4026
0.9	0.9844				0.4455		0.9		0.02432	0.04932		0.985001					13.1899
0.95	1.009				0.4456		0.95		0.02438	0.04932		1.00959					12.9746
1	1.036				0.4457		1		0.02444	0.04931		1.03658					12.7443
1.05	1.063				0.4458		1.05		0.0245	0.0493		1.06356					12.5198
1.1	1.092				0.446		1.1		0.02457	0.04929		1.09255					12.2841
1.15	1.123				0.4461		1.15		0.02465	0.04929		1.12354					12.04
1.2	1.155				0.4463		1.2		0.02473	0.04928		1.15553					11.7941
1.25	1.188				0.4464		1.25		0.02481	0.04927		1.18852					11.5484
1.3	1.223				0.4466		1.3		0.02489	0.04926		1.22351					11.2943
1.35	1.258				0.4468		1.35		0.02498	0.04925		1.2585					11.0473
1.4	1.295				0.4469		1.4		0.02508	0.04924		1.29549					10.7946
1.45	1.334				0.4471		1.45		0.02518	0.04923		1.33448					10.5349
1.5	1.373				0.4473		1.5		0.02528	0.04922		1.37347					10.2827
1.55	1.414				0.4475		1.55		0.02539	0.04921		1.41446					10.0252
1.6	1.455				0.4477		1.6		0.0255	0.0492		1.45545					9.775
1.65	1.497				0.4479		1.65		0.02562	0.04918		1.49744					9.5259
1.7	1.54				0.4481		1.7		0.02575	0.04917		1.54043					9.27799
1.75	1.584				0.4483		1.75		0.02588	0.04916		1.58442					9.03138
1.8	1.629				0.4486		1.8		0.02601	0.04915		1.62942					8.78517
1.85	1.674				0.4488		1.85		0.02615	0.04913		1.67441					8.54656
1.9	1.72				0.449		1.9		0.0263	0.04912		1.7204					8.30917
1.95	1.766				0.4493		1.95		0.02645	0.0491		1.7664					8.07703
2	1.813				0.4495		2		0.02661	0.04909		1.81339					7.84697
2.05	1.861				0.4498		2.05		0.02678	0.04907		1.86139					7.61711
2.1	1.908		1.216	0.717	0.45		2.1		0.02695	0.04906		1.90838		0.718012			7.39854		15.8986
2.15	1.957		1.355	0.6247	0.4503		2.15		0.02713	0.04904		1.95738		0.625877			7.17541		17.0922
2.2	2.005		1.467	0.5609	0.4506		2.2		0.02732	0.04903		2.00537		0.562229			6.96205		18.0246
2.25	2.054		1.565	0.5112	0.4509		2.25		0.02752	0.04901		2.05437		0.512679			6.74944		18.8271
2.3	2.103		1.655	0.4703	0.4512		2.3		0.02773	0.04899		2.10337		0.471932			6.54178		19.548
2.35	2.153		1.738	0.4356	0.4515		2.35		0.02794	0.04898		2.15336		0.437388			6.33481		20.2102
2.4	2.202		1.818	0.4055	0.4518		2.4		0.02817	0.04896		2.20236		0.407452			6.13646		20.8286
2.45	2.252		1.894	0.379	0.4521		2.45		0.0284	0.04894		2.25236		0.381122			5.93856		21.412
2.5	2.303		1.968	0.3553	0.4524		2.5		0.02865	0.04892		2.30336		0.357603			5.74118		21.9692
2.55	2.353		2.039	0.3341	0.4527		2.55		0.02891	0.04891		2.35336		0.336592			5.55174		22.4998
2.6	2.404		2.109	0.3149	0.453		2.6		0.02918	0.04889		2.40435		0.317592			5.36262		23.0099
2.65	2.454		2.177	0.2975	0.4534		2.65		0.02946	0.04887		2.45435		0.300403			5.17998		23.4987
2.7	2.505		2.244	0.2815	0.4537		2.7		0.02975	0.04885		2.50535		0.284627			4.99845		23.9747
2.75	2.557		2.31	0.2668	0.4541		2.75		0.03006	0.04883		2.55735		0.270166			4.81617		24.4354
2.8	2.608		2.375	0.2532	0.4544		2.8		0.03038	0.04881		2.60835		0.256819			4.64176		24.8854
2.85	2.66		2.439	0.2407	0.4548		2.85		0.03072	0.04879		2.66035		0.244589			4.46646		25.3195
2.9	2.711		2.503	0.229	0.4552		2.9		0.03108	0.04876		2.71136		0.23318			4.29769		25.7466
2.95	2.763		2.566	0.2181	0.4555		2.95		0.03145	0.04874		2.76336		0.222589			4.1298		26.1651
3	2.815		2.629	0.208	0.4559		3		0.03184	0.04872		2.81536		0.212818			3.96404		26.5708
3.05	2.868		2.691	0.1985	0.4563		3.05		0.03226	0.0487		2.86836		0.203675			3.79822		26.9703
3.1	2.92		2.753	0.1897	0.4567		3.1		0.03269	0.04868		2.92037		0.195252			3.63834		27.3574
3.15	2.972		2.814	0.1813	0.4571		3.15		0.03315	0.04865		2.97237		0.187263			3.48122		27.7436
3.2	3.025		2.875	0.1735	0.4575		3.2		0.03364	0.04863		3.02537		0.179904			3.32389		28.118
3.25	3.078		2.936	0.1661	0.4579		3.25		0.03415	0.04861		3.07838		0.172979			3.16923		28.4885
3.3	3.131		2.997	0.1591	0.4584		3.3		0.0347	0.04858		3.13138		0.166496			3.0162		28.853
3.35	3.184		3.058	0.1525	0.4588		3.35		0.03527	0.04856		3.18439		0.16045			2.86662		29.2119
3.4	3.237		3.119	0.1462	0.4592		3.4		0.03589	0.04853		3.2374		0.15476			2.71944		29.5685
3.45	3.29		3.179	0.1403	0.4597		3.45		0.03654	0.04851		3.29041		0.149514			2.57365		29.9148
3.5	3.344		3.239	0.1347	0.4601		3.5		0.03723	0.04848		3.34441		0.144624			2.42846		30.2572
3.55	3.397		3.3	0.1293	0.4606		3.55		0.03797	0.04846		3.39742		0.140007			2.28716		30.5991
3.6	3.451		3.36	0.1243	0.4611		3.6		0.03877	0.04843		3.45144		0.135855			2.14546		30.9272
3.65	3.504		3.42	0.1194	0.4615		3.65		0.03962	0.0484		3.50445		0.131893			2.00931		31.2615
3.7	3.558		3.481	0.1148	0.462		3.7		0.04053	0.04838		3.55846		0.128314			1.87177		31.5852
3.75	3.611		3.541	0.1104	0.4625		3.75		0.04151	0.04835		3.61148		0.125037			1.73864		31.9054
3.8	3.664		3.601	0.1062	0.463		3.8		0.04258	0.04832		3.66449		0.122084			1.60738		32.2208
3.85	3.715		3.659	0.1022	0.4635		3.85		0.04373	0.04829		3.71551		0.119455			1.48263		32.5303
3.9	3.758		3.71	0.09831	0.464		3.9		0.04498	0.04826		3.75854		0.117095			1.37798		32.8402
3.95	3.839		3.798	0.09462	0.4645		3.95		0.04634	0.04823		3.83956		0.115099			1.18807		33.1418
4	3.884		3.853	0.09108	0.465		4		0.04783	0.0482		3.88459		0.11345			1.08217		33.438
4.05	3.933		3.915	0.08769	0.4655		4.05		0.04947	0.04817		3.93362		0.112179			0.968607		33.7272
4.1				0.08444	0.4661		4.1		0.05127	0.04814				0.111298					34.0079
4.15				0.08131	0.4666		4.15		0.05328	0.04811				0.110855					34.2816
4.2				0.0783	0.4672		4.2		0.05551	0.04808				0.110877					34.5447
4.25				0.0754	0.4677		4.25		0.05801	0.04805				0.111425					34.7969
4.3				0.07261	0.4683		4.3		0.06083	0.04802				0.112573					35.0332
4.35				0.06993	0.4689		4.35		0.06402	0.04799				0.1144					35.2507
4.4				0.06734	0.4694		4.4		0.06767	0.04796				0.117018					35.4468
4.45				0.06484	0.47		4.45		0.07188	0.04792				0.120572					35.6134
4.5				0.06242	0.4706		4.5		0.07675	0.04789				0.125209					35.7443
4.55				0.06009	0.4712		4.55		0.08244	0.04786				0.131162					35.8281
4.6				0.05783	0.4718		4.6		0.08915	0.04782				0.138707					35.854
4.65				0.05565	0.4724		4.65		0.09709	0.04779				0.148155					35.806
4.7				0.05354	0.473		4.7		0.1065	0.04775				0.159847					35.6702
4.75				0.0515	0.4737		4.75		0.1177	0.04772				0.174238					35.4287
4.8				0.04951	0.4743		4.8		0.1309	0.04768				0.191627					35.0761
4.85				0.04759	0.4749		4.85		0.1461	0.04765				0.212026					34.6152
4.9				0.04573	0.4756		4.9		0.1634	0.04761				0.235564					34.0562
4.95				0.04392	0.4762		4.95		0.1822	0.04758				0.261386					33.4384
5				0.04216	0.4769		5		0.2022	0.04754				0.289045					32.7892
5.05				0.04045	0.4776		5.05		0.2227	0.0475				0.317532					32.1443
5.1				0.03879	0.4783		5.1		0.2435	0.04747				0.346539					31.5154
5.15				0.03717	0.4789		5.15		0.264	0.04743				0.375198					30.9253
5.2				0.03559	0.4796		5.2		0.2843	0.04739				0.403633					30.3683
5.25				0.03406	0.4803		5.25		0.304	0.04735				0.431268					29.8534
5.3				0.03257	0.481		5.3	0.1105	0.3232	0.04731				0.458233	0.159629				29.3746	37.3268
5.35				0.03111	0.4818		5.35	0.0852	0.3418	0.04727				0.484378	0.124442				28.9312	38.9257
5.4				0.02969	0.4825		5.4	0.06999	0.3598	0.04723				0.509699	0.103338				28.5202	40.0581
5.45				0.0283	0.4832		5.45	0.05919	0.377	0.04719				0.533909	0.0883618				28.1433	40.9833
5.5				0.02694	0.484		5.5	0.05096	0.3931	0.04715				0.55658	0.076939				27.8038	41.7888
5.55				0.02562	0.4847		5.55	0.0444	0.4059	0.04711				0.574601	0.0678167				27.5445	42.5191
5.6				0.02432	0.4854		5.6	0.03903		0.04707					0.060317					43.2027
5.65				0.02305	0.4862		5.65	0.03452		0.04703					0.0539867					43.8557
5.7				0.02181	0.487		5.7	0.03069		0.04699					0.0485739					44.4886
5.75				0.0206	0.4878		5.75	0.02737		0.04695					0.0438474					45.1122
5.8				0.01941	0.4885		5.8	0.02447		0.04691					0.0396776					45.7364
5.85				0.01824	0.4893		5.85	0.02192		0.04686					0.0359676					46.3655
5.9				0.0171	0.4901		5.9	0.01964		0.04682					0.032617					47.0035
5.95				0.01597	0.4909		5.95	0.0176		0.04678					0.029573					47.6621
6				0.01487	0.4917		6	0.01576		0.04673					0.0267931					48.3388
6.05				0.01379	0.4926		6.05	0.01409		0.04669					0.0242326					49.042
6.1				0.01272	0.4934		6.1	0.01256		0.04664					0.0218473					49.786
6.15				0.01167	0.4942		6.15	0.01116		0.0466					0.0196286					50.571
6.2				0.01064	0.4951		6.2	0.009866		0.04656					0.0175467					51.4057
6.25				0.009622	0.4959		6.25	0.00867		0.04651					0.0155859					52.3075
6.3				0.008621	0.4968		6.3	0.007559		0.04646					0.0137331					53.286
6.35				0.007634	0.4977		6.35	0.006522		0.04642					0.0119729					54.3633
6.4				0.00666	0.4985		6.4	0.005551		0.04637					0.0102948					55.5684
6.45				0.005698	0.4994		6.45	0.00464		0.04633					0.00869059					56.9396
6.5				0.004749	0.5003		6.5	0.003781		0.04628					0.00715157					58.5365
6.55				0.003811	0.5012		6.55	0.00297		0.04623					0.00567147					60.4603
6.6				0.002883	0.5021		6.6	0.002201		0.04619					0.0042427					62.8952
6.65				0.001965	0.5031		6.65	0.001471		0.04614					0.00286163					66.2337
6.7				0.001056	0.504		6.7	0.000776		0.04609					0.00152299					71.6358
6.75				0.0001553	0.5049		6.75	0.0001122		0.04604					0.000222027					88.292
6.8				0.0007372	0.5059		6.8	0.0005232		0.04599					0.00104448					74.7695
6.85				0.001623	0.5068		6.85	0.001133		0.04594					0.00228068					67.92
6.9				0.002501	0.5078		6.9	0.001718		0.04589					0.00348684					64.1678
6.95				0.003374	0.5087		6.95	0.002283		0.04585					0.00466991					61.5705
7				0.004241	0.5097		7	0.002828		0.0458					0.00582934					59.586
[truncated: 9 more columns]

## Sheet: Data 5
		1st mode						3rd mode					Overall					Overall							1st mode						3rd mode					Overall					Overall							1st mode
		Amplitude Ratio						Amplitude Ratio					Amplitude Ratio					IL							Amplitude Ratio						Amplitude Ratio					Amplitude Ratio					IL							Amplitude Ratio
0.2	0.3562	0.3569			0.4445		0.2		0.007953	0.04938		0.356378	0.357077				12.4869	12.4699					0.2	0.499	0.5008			0.4445		0.2		0.01578	0.04938		0.499499	0.501297				9.55831	9.52704					0.2	0.1936	0.1937
0.25	0.3603	0.3613			0.4445		0.25		0.007957	0.04938		0.360476	0.361475				12.3875	12.3635					0.25	0.5029	0.505			0.4445		0.25		0.0158	0.04938		0.503396	0.505494				9.4907	9.45451					0.25	0.1967	0.1968
0.3	0.3654	0.3668			0.4446		0.3		0.007963	0.04938		0.365573	0.366973				12.2645	12.2313					0.3	0.5077	0.5102			0.4446		0.3		0.01581	0.04938		0.508192	0.51069				9.40723	9.36457					0.3	0.2006	0.2008
0.35	0.3716	0.3739			0.4446		0.35		0.007969	0.04937		0.371771	0.37407				12.1183	12.0648					0.35	0.5134	0.5167			0.4446		0.35		0.01583	0.04937		0.513888	0.517185				9.31027	9.25463					0.35	0.2064	0.2064
0.4	0.3846	0.3845			0.4446		0.4		0.007977	0.04937		0.384765	0.384665				11.8197	11.822					0.4	0.5202	0.5249			0.4446		0.4		0.01585	0.04937		0.520683	0.525378				9.196	9.11789					0.4	0.2115	0.4357
0.45	0.3876	0.443			0.4447		0.45		0.007985	0.04937		0.387764	0.443144				11.7512	10.5909					0.45	0.528	0.5359			0.4447		0.45		0.01587	0.04937		0.528477	0.53637				9.06578	8.93681					0.45	0.2181
0.5	0.3968	0.7275			0.4448		0.5		0.007995	0.04936		0.396961	0.727588				11.5465	6.28158					0.5	0.5585	0.556			0.4448		0.5		0.0159	0.04936		0.558952	0.556455				8.57711	8.61607					0.5	0.2265
0.55	0.4077				0.4448		0.55		0.008006	0.04936		0.407857					11.3112						0.55	0.5471	0.6504			0.4448		0.55		0.01593	0.04936		0.547564	0.65079				8.7562	7.25416					0.55	0.2366
0.6	0.4211				0.4449		0.6		0.008018	0.04936		0.421253					11.0293						0.6	0.558	0.8953			0.4449		0.6		0.01597	0.04936		0.558457	0.895585				8.5839	4.4777					0.6	0.2486
0.65	0.4363				0.445		0.65		0.00803	0.04935		0.436448					10.7204						0.65	0.5674				0.445		0.65		0.016	0.04935		0.567851					8.43785						0.65	0.263
0.7	0.4535				0.4451		0.7		0.008044	0.04935		0.453643					10.3836						0.7	0.5818				0.4451		0.7		0.01604	0.04935		0.582242					8.21922						0.7	0.2803
0.75	0.4729				0.4452		0.75		0.00806	0.04934		0.473037					10.0188						0.75	0.5979				0.4452		0.75		0.01608	0.04934		0.598332					7.98118						0.75	0.3011
0.8	0.4948				0.4453		0.8		0.008076	0.04934		0.494932					9.62462						0.8	0.6155				0.4453		0.8		0.01613	0.04934		0.615923					7.72825						0.8	0.3262
0.85	0.5194				0.4454		0.85		0.008093	0.04933		0.519526					9.20223						0.85	0.6347				0.4454		0.85		0.01618	0.04933		0.635112					7.4605						0.85	0.3562
0.9	0.5468				0.4455		0.9		0.008112	0.04932		0.54692					8.75474						0.9	0.6558				0.4455		0.9		0.01623	0.04932		0.656202					7.17551						0.9	0.392
0.95	0.5773				0.4456		0.95		0.008131	0.04932		0.577415					8.28233						0.95	0.6789				0.4456		0.95		0.01629	0.04932		0.679291					6.87388						0.95	0.434
1	0.611				0.4457		1		0.008152	0.04931		0.611109					7.78858						1	0.7039				0.4457		1		0.01635	0.04931		0.70428					6.55884						1	0.4821
1.05	0.6478				0.4458		1.05		0.008174	0.0493		0.647903					7.27963						1.05	0.7311				0.4458		1.05		0.01641	0.0493		0.731468					6.22858						1.05	0.5358
1.1	0.6878				0.446		1.1		0.008198	0.04929		0.687898					6.75727						1.1	0.7605				0.446		1.1		0.01648	0.04929		0.760857					5.88422						1.1	0.594
1.15	0.7307				0.4461		1.15		0.008222	0.04929		0.730793					6.23077						1.15	0.7921				0.4461		1.15		0.01655	0.04929		0.792446					5.52966						1.15	0.6553
1.2	0.7763				0.4463		1.2		0.008248	0.04928		0.776388					5.70303						1.2	0.826				0.4463		1.2		0.01662	0.04928		0.826334					5.16374						1.2	0.7186
1.25	0.8244				0.4464		1.25		0.008276	0.04927		0.824483					5.1799						1.25	0.8622				0.4464		1.25		0.0167	0.04927		0.862523					4.79024						1.25	0.783
1.3	0.8744				0.4466		1.3		0.008305	0.04926		0.874479					4.66652						1.3	0.9005				0.4466		1.3		0.01678	0.04926		0.900813					4.41081						1.3	0.8477
1.35	0.9262				0.4468		1.35		0.008335	0.04925		0.926275					4.1647						1.35	0.9408				0.4468		1.35		0.01687	0.04925		0.941102					4.02861						1.35	0.9124
1.4	0.9793				0.4469		1.4		0.008366	0.04924		0.979371					3.67951						1.4	0.9832				0.4469		1.4		0.01696	0.04924		0.983493					3.64477						1.4	0.9769
1.45	1.034				0.4471		1.45		0.0084	0.04923		1.03407					3.20548						1.45	1.027				0.4471		1.45		0.01705	0.04923		1.02728					3.26428						1.45	1.041
1.5	1.089				0.4473		1.5		0.008434	0.04922		1.08907					2.7534						1.5	1.073				0.4473		1.5		0.01715	0.04922		1.07327					2.88177						1.5	1.105
1.55	1.144				0.4475		1.55		0.008471	0.04921		1.14406					2.3235						1.55	1.12				0.4475		1.55		0.01725	0.04921		1.12027					2.50748						1.55	1.172
1.6	1.2				0.4477		1.6		0.008509	0.0492		1.20006					1.90646						1.6	1.169				0.4477		1.6		0.01736	0.0492		1.16926					2.13363						1.6	1.223
1.65	1.257				0.4479		1.65		0.008548	0.04918		1.25706					1.50144						1.65	1.219				0.4479		1.65		0.01748	0.04918		1.21925					1.76792						1.65	1.29
1.7	1.313			0.5857	0.4481		1.7		0.00859	0.04917		1.31306		0.585826			1.12092		8.13254				1.7	1.269				0.4481		1.7		0.0176	0.04917		1.26924					1.41683						1.7	1.352
1.75	1.37			0.4403	0.4483		1.75		0.008633	0.04916		1.37005		0.440469			0.749863		10.609				1.75	1.321				0.4483		1.75		0.01772	0.04916		1.32124					1.06608						1.75	1.415
1.8	1.427			0.3723	0.4486		1.8		0.008679	0.04915		1.42705		0.372502			0.392893		12.063				1.8	1.373				0.4486		1.8		0.01785	0.04915		1.37323					0.727836						1.8	1.477
1.85	1.483			0.3254	0.4488		1.85		0.008726	0.04913		1.48305		0.325634			0.0566156		13.2304				1.85	1.426				0.4488		1.85		0.01799	0.04913		1.42623					0.39693						1.85	1.538
1.9	1.54			0.2895	0.449		1.9		0.008775	0.04912		1.54005		0.289766			-0.272909		14.2437				1.9	1.479				0.449		1.9		0.01813	0.04912		1.47922					0.0780303						1.9	1.6
1.95	1.597			0.2607	0.4493		1.95		0.008826	0.0491		1.59705		0.260999			-0.591492		15.1507				1.95	1.532				0.4493		1.95		0.01828	0.0491		1.53222					-0.230675						1.95	1.66
2	1.654			0.2369	0.4495		2		0.00888	0.04909		1.65405		0.237233			-0.898034		15.9801				2	1.586				0.4495		2		0.01843	0.04909		1.58621					-0.533489						2
2.05	1.71			0.2167	0.4498		2.05		0.008936	0.04907		1.71005		0.217068			-1.19014		16.751				2.05	1.641				0.4498		2.05		0.01859	0.04907		1.64121					-0.832488						2.05
2.1	1.767			0.1993	0.45		2.1		0.008994	0.04906		1.76705		0.199705			-1.47688		17.4758				2.1	1.695			0.6506	0.45		2.1		0.01876	0.04906		1.69521		0.651141			-1.11564		7.20081				2.1
2.15	1.824			0.1842	0.4503		2.15		0.009055	0.04904		1.82404		0.184645			-1.75554		18.1569				2.15	1.749			0.5494	0.4503		2.15		0.01894	0.04904		1.74921		0.550053			-1.39093		8.66608				2.15
2.2	1.88			0.1709	0.4506		2.2		0.009119	0.04903		1.88004		0.171386			-2.02109		18.8046				2.2	1.804			0.4848	0.4506		2.2		0.01912	0.04903		1.8042		0.485553			-1.66275		9.74937				2.2
2.25	1.937			0.1591	0.4509		2.25		0.009185	0.04901		1.93704		0.159629			-2.28342		19.4226				2.25	1.859			0.4365	0.4509		2.25		0.01932	0.04901		1.8592		0.437354			-1.92649		10.6577				2.25
2.3	1.993			0.1486	0.4512		2.3		0.009254	0.04899		1.99304		0.149175			-2.53386		20.0123				2.3	1.913			0.3978	0.4512		2.3		0.01952	0.04899		1.9132		0.398757			-2.17809		11.4607				2.3
2.35	2.05			0.1391	0.4515		2.35		0.009326	0.04898		2.05004		0.139724			-2.78167		20.5826				2.35	1.968			0.3656	0.4515		2.35		0.01973	0.04898		1.9682		0.366663			-2.42717		12.1906				2.35
2.4	2.106			0.1305	0.4518		2.4		0.009402	0.04896		2.10604		0.131176			-3.01865		21.1334				2.4	2.023			0.3382	0.4518		2.4		0.01995	0.04896		2.0232		0.339375			-2.66947		12.8638				2.4
2.45	2.163			0.1228	0.4521		2.45		0.009481	0.04894		2.16304		0.12353			-3.25349		21.6581				2.45	2.078			0.3145	0.4521		2.45		0.02018	0.04894		2.0782		0.315792			-2.90534		13.4914				2.45
2.5	2.219			0.1157	0.4524		2.5		0.009563	0.04892		2.21904		0.116488			-3.47839		22.1717				2.5	2.133			0.2937	0.4524		2.5		0.02042	0.04892		2.1332		0.295116			-3.13513		14.0822				2.5
2.55	2.276			0.1092	0.4527		2.55		0.009649	0.04891		2.27604		0.110049			-3.70157		22.6701				2.55	2.188			0.2752	0.4527		2.55		0.02067	0.04891		2.1882		0.276748			-3.35914		14.6436				2.55
2.6	2.333			0.1033	0.453		2.6		0.009739	0.04889		2.33304		0.104214			-3.91929		23.1487				2.6	2.243			0.2587	0.453		2.6		0.02094	0.04889		2.2432		0.260389			-3.57765		15.177				2.6
2.65	2.389			0.09778	0.4534		2.65		0.009834	0.04887		2.38904		0.0987641			-4.12915		23.6207				2.65	2.298			0.2439	0.4534		2.65		0.02121	0.04887		2.2982		0.245738			-3.7919		15.6839				2.65
2.7	2.445			0.09272	0.4537		2.7		0.009933	0.04885		2.44504		0.0937781			-4.33328		24.0781				2.7	2.354			0.2304	0.4537		2.7		0.02151	0.04885		2.3542		0.232399			-4.0039		16.1745				2.7
2.75	2.502			0.08803	0.4541		2.75		0.01004	0.04883		2.50204		0.0891677			-4.53728		24.5237				2.75	2.409			0.2182	0.4541		2.75		0.02181	0.04883		2.4092		0.220369			-4.20833		16.6421				2.75
2.8	2.558			0.08367	0.4544		2.8		0.01014	0.04881		2.55804		0.08489			-4.73241		24.9605				2.8	2.464			0.207	0.4544		2.8		0.02213	0.04881		2.4642		0.209353			-4.40727		17.0956				2.8
2.85	2.614			0.07962	0.4548		2.85		0.01026	0.04879		2.61404		0.0809313			-4.92433		25.3859				2.85	2.519			0.1967	0.4548		2.85		0.02247	0.04879		2.5192		0.19925			-4.60284		17.5336				2.85
2.9	2.67			0.07584	0.4552		2.9		0.01038	0.04876		2.67004		0.0772476			-5.11226		25.8026				2.9	2.574			0.1873	0.4552		2.9		0.02282	0.04876		2.5742		0.19006			-4.79427		17.9534				2.9
2.95	2.725			0.07231	0.4555		2.95		0.0105	0.04874		2.72504		0.0738189			-5.29223		26.2116				2.95	2.629			0.1785	0.4555		2.95		0.02319	0.04874		2.6292		0.181488			-4.98077		18.3667				2.95
3	2.779			0.069	0.4559		3		0.01064	0.04872		2.77904		0.0706217			-5.46648		26.6123				3	2.685			0.1704	0.4559		3		0.02359	0.04872		2.68521		0.173635			-5.16765		18.7642				3
3.05				0.0659	0.4563		3.05		0.01078	0.0487				0.0676404					27.0051				3.05	2.74			0.1629	0.4563		3.05		0.024	0.0487		2.74021		0.166398			-5.34759		19.149				3.05
3.1				0.06299	0.4567		3.1		0.01092	0.04868				0.0648555					27.3905				3.1	2.795			0.1559	0.4567		3.1		0.02444	0.04868		2.79521		0.159685			-5.52402		19.5241				3.1
3.15				0.06024	0.4571		3.15		0.01108	0.04865				0.0622446					27.771				3.15	2.851			0.1493	0.4571		3.15		0.0249	0.04865		2.85122		0.153397			-5.70013		19.8931				3.15
3.2				0.05766	0.4575		3.2		0.01124	0.04863				0.059811					28.1437				3.2	2.906			0.1432	0.4575		3.2		0.02539	0.04863		2.90622		0.147633			-5.86989		20.2483				3.2
3.25				0.05522	0.4579		3.25		0.01141	0.04861				0.0575293					28.5112				3.25	2.961			0.1375	0.4579		3.25		0.02591	0.04861		2.96123		0.142299			-6.03655		20.5936				3.25
3.3				0.05291	0.4584		3.3		0.0116	0.04858				0.0553948					28.8728				3.3	3.017			0.1321	0.4584		3.3		0.02645	0.04858		3.01723		0.137294			-6.20402		20.9327				3.3
3.35				0.05073	0.4588		3.35		0.01179	0.04856				0.0533998					29.2291				3.35	3.072			0.1271	0.4588		3.35		0.02704	0.04856		3.07224		0.132728			-6.36473		21.2594				3.35
3.4				0.04866	0.4592		3.4		0.012	0.04853				0.0515344					29.5811				3.4	3.127			0.1223	0.4592		3.4		0.02766	0.04853		3.12724		0.128403			-6.52265		21.5847				3.4
3.45				0.0467	0.4597		3.45		0.01222	0.04851				0.049795					29.9266				3.45	3.182			0.1178	0.4597		3.45		0.02832	0.04851		3.18225		0.124422			-6.67882		21.8997				3.45
3.5				0.04483	0.4601		3.5		0.01245	0.04848				0.0481636					30.2701				3.5	3.238			0.1136	0.4601		3.5		0.02902	0.04848		3.23826		0.120786			-6.83413		22.2046				3.5
3.55				0.04306	0.4606		3.55		0.0127	0.04846				0.0466556					30.6065				3.55	3.293			0.1096	0.4606		3.55		0.02977	0.04846		3.29327		0.117408			-6.98515		22.5036				3.55
3.6				0.04137	0.4611		3.6		0.01297	0.04843				0.0452539					30.9396				3.6	3.348			0.1058	0.4611		3.6		0.03058	0.04843		3.34828		0.114297			-7.13374		22.7968				3.6
3.65				0.03977	0.4615		3.65		0.01326	0.0484				0.0439694					31.2671				3.65	3.403			0.1022	0.4615		3.65		0.03145	0.0484		3.40329		0.111459			-7.27903		23.0838				3.65
3.7				0.03823	0.462		3.7		0.01357	0.04838				0.0427764					31.5924				3.7	3.458			0.09873	0.462		3.7		0.03238	0.04838		3.4583		0.108833			-7.423		23.3678				3.7
3.75				0.03677	0.4625		3.75		0.01391	0.04835				0.0417014					31.911				3.75	3.512			0.09548	0.4625		3.75		0.03338	0.04835		3.51232		0.106512			-7.56229		23.641				3.75
3.8				0.03537	0.463		3.8		0.01427	0.04832				0.0407223					32.2264				3.8	3.567			0.09239	0.463		3.8		0.03447	0.04832		3.56733		0.104462			-7.70196		23.9073				3.8
3.85				0.03403	0.4635		3.85		0.01466	0.04829				0.0398481					32.5375				3.85	3.62			0.08945	0.4635		3.85		0.03565	0.04829		3.62035		0.10268			-7.83476		24.1665				3.85
3.9				0.03275	0.464		3.9		0.01509	0.04826				0.0390894					32.8429				3.9	3.672			0.08665	0.464		3.9		0.03693	0.04826		3.67237		0.101172			-7.96332		24.4184				3.9
3.95				0.03153	0.4645		3.95		0.01556	0.04823				0.0384496					33.1414				3.95				0.08397	0.4645		3.95		0.03832	0.04823				0.099939					24.6638				3.95
4				0.03035	0.465		4		0.01607	0.0482				0.0379159					33.4369				4				0.08142	0.465		4		0.03985	0.0482				0.0990215					24.9004				4
4.05				0.02922	0.4655		4.05		0.01664	0.04817				0.0375178					33.7251				4.05				0.07898	0.4655		4.05		0.04154	0.04817				0.0984326					25.1287				4.05
4.1				0.02814	0.4661		4.1		0.01726	0.04814				0.0372515					34.0037				4.1				0.07665	0.4661		4.1		0.04339	0.04814				0.0981866					25.3466				4.1
4.15				0.0271	0.4666		4.15		0.01796	0.04811				0.0371421					34.2746				4.15				0.07441	0.4666		4.15		0.04545	0.04811				0.0983273					25.556				4.15
4.2				0.02609	0.4672		4.2		0.01874	0.04808				0.0371896					34.5372				4.2				0.07227	0.4672		4.2		0.04775	0.04808				0.0989094					25.7521				4.2
4.25				0.02513	0.4677		4.25		0.01963	0.04805				0.0374458					34.7835				4.25				0.07022	0.4677		4.25		0.05032	0.04805				0.0999753					25.9355				4.25
4.3				0.0242	0.4683		4.3		0.02063	0.04802				0.0379056					35.0151				4.3				0.06826	0.4683		4.3		0.05321	0.04802				0.101597					26.1014				4.3
4.35				0.02331	0.4689		4.35		0.02179	0.04799				0.0386389					35.2237				4.35				0.06637	0.4689		4.35		0.0565	0.04799				0.103872					26.2491				4.35
4.4				0.02244	0.4694		4.4		0.02312	0.04796				0.0396563					35.4115				4.4				0.06456	0.4694		4.4		0.06025	0.04796				0.106902					26.3739				4.4
4.45				0.02161	0.47		4.45		0.02469	0.04792				0.0410632					35.561				4.45				0.06282	0.47		4.45		0.06456	0.04792				0.110826					26.47				4.45
4.5				0.02081	0.4706		4.5		0.02655	0.04789				0.0429286					35.6653				4.5				0.06114	0.4706		4.5		0.06955	0.04789				0.115812					26.5317				4.5
4.55				0.02003	0.4712		4.55		0.02879	0.04786				0.0453754					35.7124				4.55				0.05953	0.4712		4.55		0.07539	0.04786				0.122111					26.5484				4.55
4.6				0.01928	0.4718		4.6		0.03154	0.04782				0.0485928					35.6781				4.6				0.05798	0.4718		4.6		0.08224	0.04782				0.129956					26.5113				4.6
4.65				0.01855	0.4724		4.65		0.035	0.04779				0.0528593					35.534				4.65				0.05649	0.4724		4.65		0.09035	0.04779				0.139705					26.406				4.65
4.7				0.01785	0.473		4.7		0.03945	0.04775				0.0585767					35.2384				4.7				0.05505	0.473		4.7		0.09997	0.04775				0.151719					26.2199				4.7
4.75				0.01716	0.4737		4.75		0.04534	0.04772				0.0663769					34.7407				4.75				0.05366	0.4737		4.75		0.1114	0.04772				0.166431					25.9374				4.75
4.8				0.0165	0.4743		4.8		0.0534	0.04768				0.0773005					33.968				4.8				0.05232	0.4743		4.8		0.1248	0.04768				0.184085					25.554				4.8
4.85				0.01586	0.4749		4.85		0.06473	0.04765				0.0929058					32.8503				4.85				0.05103	0.4749		4.85		0.1404	0.04765				0.205008					25.0651				4.85
4.9				0.01524	0.4756		4.9		0.08079	0.04761				0.115266					31.3551				4.9				0.04979	0.4756		4.9		0.158	0.04761				0.228926					24.4903				4.9
4.95				0.01464	0.4762		4.95		0.1025	0.04758				0.145694					29.5788				4.95				0.04858	0.4762		4.95		0.1772	0.04758				0.255264					23.8596				4.95
5				0.01405	0.4769		5		0.1288	0.04754				0.182692					27.769				5				0.04742	0.4769		5		0.1977	0.04754				0.283583					23.1979				5
5.05				0.01348	0.4776		5.05		0.1564	0.0475				0.221593					26.1788				5.05				0.04629	0.4776		5.05		0.2188	0.0475				0.312873					22.5404				5.05
5.1				0.01293	0.4783		5.1		0.1824	0.04747				0.258276					24.8964				5.1				0.0452	0.4783		5.1		0.2401	0.04747				0.342548					21.9042				5.1
5.15				0.01239	0.4789		5.15		0.07964	0.04743				0.113307					31.7059				5.15				0.04415	0.4789		5.15		0.2613	0.04743				0.372162					21.3016				5.15
5.2				0.01186	0.4796		5.2		0.05316	0.04739				0.0761093					34.7456				5.2				0.04313	0.4796		5.2		0.2821	0.04739				0.401274					20.7393				5.2
5.25				0.01135	0.4803		5.25		0.04032	0.04735				0.0581397					36.6589				5.25				0.04214	0.4803		5.25		0.3024	0.04735				0.429729					20.2169				5.25
5.3				0.01086	0.481		5.3		0.03227	0.04731				0.046911					38.0894				5.3				0.04118	0.481		5.3		0.3222	0.04731				0.457517					19.7312				5.3
5.35				0.01037	0.4818		5.35		0.02666	0.04727				0.039103					39.2443				5.35				0.04025	0.4818		5.35	0.1296	0.3415	0.04727				0.484628	0.18765				19.279	26.2553			5.35
5.4				0.009896	0.4825		5.4		0.02251	0.04723				0.0333366					40.2175				5.4				0.03936	0.4825		5.4	0.1015	0.3603	0.04723				0.511059	0.148841				18.8573	27.6431			5.4
5.45				0.009433	0.4832		5.45		0.0193	0.04719				0.0288784					41.0706				5.45				0.03848	0.4832		5.45	0.08564	0.3786	0.04719				0.536802	0.127079				18.4638	28.515			5.45
5.5				0.008981	0.484		5.5		0.01675	0.04715				0.0253334					41.8379				5.5				0.03764	0.484		5.5	0.07453	0.3963	0.04715				0.561715	0.111921				18.0978	29.1738			5.5
5.55				0.008539	0.4847		5.55		0.01466	0.04711				0.022422					42.55				5.55				0.03682	0.4847		5.55	0.06611	0.4136	0.04711				0.586076	0.100483				17.7534	29.7106			5.55
5.6				0.008107	0.4854		5.6		0.01293	0.04707				0.0200023					43.2202				5.6				0.03602	0.4854		5.6	0.05943	0.4305	0.04707				0.609884	0.0914401				17.4288	30.167			5.6
5.65				0.007685	0.4862		5.65		0.01146	0.04703				0.0179366					43.865				5.65				0.03524	0.4862		5.65	0.05396	0.4469	0.04703				0.632994	0.0840549				17.1244	30.5667			5.65
5.7				0.007271	0.487		5.7		0.0102	0.04699				0.0161539					44.4948				5.7				0.03449	0.487		5.7	0.04939	0.4629	0.04699				0.655547	0.0778993				16.8367	30.9228			5.7
5.75				0.006866	0.4878		5.75		0.009107	0.04695				0.0145951					45.1168				5.75				0.03376	0.4878		5.75	0.0455	0.4784	0.04695				0.677402	0.0726652				16.5666	31.2473			5.75
5.8				0.00647	0.4885		5.8		0.008149	0.04691				0.0132164					45.7383				5.8				0.03305	0.4885		5.8	0.04215	0.4931	0.04691				0.698131	0.0681583				16.3179	31.5473			5.8
5.85				0.006081	0.4893		5.85		0.007302	0.04686				0.011984					46.3656				5.85				0.03236	0.4893		5.85	0.03923	0.5061	0.04686				0.716465	0.0642274				16.1052	31.8269			5.85
5.9				0.005699	0.4901		5.9		0.006547	0.04682				0.0108722					47.0046				5.9				0.03168	0.4901		5.9	0.03666		0.04682					0.060758					32.0921			5.9
5.95				0.005324	0.4909		5.95		0.005869	0.04678				0.0098608					47.6606				5.95				0.03103	0.4909		5.95	0.03438		0.04678					0.0576787					32.3414			5.95
6				0.004957	0.4917		6		0.005257	0.04673				0.00893554					48.3372				6				0.03039	0.4917		6	0.03234		0.04673					0.0549118					32.5817			6
6.05				0.004595	0.4926		6.05		0.0047	0.04669				0.00808047					49.0436				6.05				0.02977	0.4926		6.05	0.0305		0.04669					0.0524095					32.8114			6.05
6.1				0.00424	0.4934		6.1		0.004192	0.04664				0.00728858					49.7842				6.1				0.02917	0.4934		6.1	0.02885		0.04664					0.0501551					33.0324			6.1
6.15				0.00389	0.4942		6.15		0.003726	0.0466				0.00654968					50.5689				6.15				0.02858	0.4942		6.15	0.02734		0.0466					0.0480808					33.2483			6.15
6.2				0.003546	0.4951		6.2		0.003296	0.04656				0.00585674					51.4044				6.2				0.02801	0.4951		6.2	0.02597		0.04656					0.0461892					33.4559			6.2
6.25				0.003208	0.4959		6.25		0.002898	0.04651				0.00520462					52.3028				6.25				0.02745	0.4959		6.25	0.02471		0.04651					0.0444373					33.6607			6.25
6.3				0.002874	0.4968		6.3		0.002528	0.04646				0.0045871					53.2815				6.3				0.02691	0.4968		6.3	0.02355		0.04646					0.0428177					33.8585			6.3
6.35				0.002545	0.4977		6.35		0.002183	0.04642				0.004001					54.358				6.35				0.02638	0.4977		6.35	0.02248		0.04642					0.0413111					34.0531			6.35
6.4				0.00222	0.4985		6.4		0.001861	0.04637				0.00344312					55.5627				6.4				0.02586	0.4985		6.4	0.02149		0.04637					0.0399046					34.2459			6.4
6.45				0.0019	0.4994		6.45		0.001558	0.04633				0.00290942					56.9298				6.45				0.02535	0.4994		6.45	0.02057		0.04633					0.0385859					34.4354			6.45
6.5				0.001583	0.5003		6.5		0.001274	0.04628				0.00239834					58.5266				6.5				0.02486	0.5003		6.5	0.01971		0.04628					0.0373495					34.6199			6.5
6.55				0.00127	0.5012		6.55		0.001007	0.04623				0.00190814					60.4472				6.55				0.02438	0.5012		6.55	0.01892		0.04623					0.0361983					34.8017			6.55
6.6				0.000961	0.5021		6.6		0.0007552	0.04619				0.00143672					62.8702				6.6				0.02391	0.5021		6.6	0.01817		0.04619					0.0350997					34.982			6.6
6.65				0.0006549	0.5031		6.65		0.0005206	0.04614				0.000985364					66.1837				6.65				0.02345	0.5031		6.65	0.01747		0.04614					0.0340632					35.1596			6.65
6.7				0.0003519	0.504		6.7		0.0003102	0.04609				0.000562389					71.4702				6.7				0.023	0.504		6.7	0.01681		0.04609					0.033078					35.3363			6.7
6.75				5.178e-05	0.5049		6.75		0.0001722	0.04604				0.000248972					83.889				6.75				0.02257	0.5049		6.75	0.0162		0.04604					0.0321603					35.5073			6.75
6.8				0.0002458	0.5059		6.8		0.0002402	0.04599				0.000419297					74.4524				6.8				0.02214	0.5059		6.8	0.01562		0.04599					0.0312754					35.6796			6.8
6.85				0.0005409	0.5068		6.85		0.0004109	0.04594				0.000793883					67.8572				6.85				0.02172	0.5068		6.85	0.01507		0.04594					0.0304297					35.851			6.85
6.9				0.0008338	0.5078		6.9		0.0005946	0.04589				0.0011842					64.14				6.9				0.02131	0.5078		6.9	0.01455		0.04589					0.029623					36.0201			6.9
6.95				0.001125	0.5087		6.95		0.000777	0.04585				0.0015726					61.5541				6.95				0.02092	0.5087		6.95	0.01405		0.04585					0.0288522					36.1847			6.95
7				0.001414	0.5097		7		0.0009551	0.0458				0.00195546					59.5756				7				0.02053	0.5097		7	0.01359		0.0458					0.0281222					36.3499			7
		Fig 5c Force
				Normalized
0.2	48.609	-0.178		1	0.00366187
0.22	48.609	-0.215		1	0.00442305
0.24	48.609	-0.256		1	0.00526651
0.26	48.609	-0.301		1	0.00619227
0.28	48.609	-0.349		1	0.00717974
0.3	48.609	-0.401		1	0.0082495
0.32	48.609	-0.456		1	0.00938098
0.34	48.609	-0.515		1	0.0105947
0.36	48.609	-0.578		1	0.0118908
0.38	48.609	-0.644		1	0.0132486
0.4	48.609	-0.715		1	0.0147092
0.42	48.609	-0.788		1	0.016211
0.44	48.609	-0.866		1	0.0178156
0.46	48.609	-0.947		1	0.019482
0.48	48.609	-1.032		1	0.0212306
0.5	48.609	-1.121		1	0.0230616
0.52	48.609	-1.214		1	0.0249748
0.54	48.609	-1.31		1	0.0269497
0.56	48.609	-1.411		1	0.0290275
0.58	48.609	-1.515		1	0.0311671
0.6	48.609	-1.623		1	0.0333889
0.62	48.609	-1.735		1	0.035693
0.64	48.609	-1.851		1	0.0380794
0.66	48.609	-1.971		1	0.040548
0.68	48.609	-2.094		1	0.0430784
0.7	48.609	-2.222		1	0.0457117
0.72	48.609	-2.354		1	0.0484272
0.74	48.609	-2.49		1	0.0512251
0.76	48.609	-2.63		1	0.0541052
0.78	48.609	-2.775		1	0.0570882
0.8	48.609	-2.923		1	0.0601329
0.82	48.609	-3.076		1	0.0632805
0.84	48.609	-3.233		1	0.0665103
0.86	48.609	-3.394		1	0.0698225
0.88	48.609	-3.559		1	0.0732169
0.9	48.609	-3.729		1	0.0767142
0.92	48.609	-3.904		1	0.0803143
0.94	48.609	-4.082		1	0.0839762
0.96	48.609	-4.266		1	0.0877615
0.98	48.609	-4.453		1	0.0916085
1	48.609	-4.646		1	0.095579
1.02	48.609	-4.843		1	0.0996318
1.04	48.609	-5.045		1	0.103787
1.06	48.609	-5.251		1	0.108025
1.08	48.609	-5.462		1	0.112366
1.1	48.609	-5.678		1	0.11681
1.12	48.609	-5.899		1	0.121356
1.14	48.609	-6.125		1	0.126005
1.16	48.609	-6.356		1	0.130758
1.18	48.609	-6.592		1	0.135613
1.2	48.609	-6.834		1	0.140591
1.22	48.609	-7.08		1	0.145652
1.24	48.609	-7.332		1	0.150836
1.26	48.609	-7.589		1	0.156123
1.28	48.609	-7.851		1	0.161513
1.3	48.609	-8.119		1	0.167027
1.32	48.609	-8.393		1	0.172663
1.34	48.609	-8.672		1	0.178403
1.36	48.609	-8.956		1	0.184246
1.38	48.609	-9.247		1	0.190232
1.4	48.609	-9.544		1	0.196342
1.42	48.609	-9.846		1	0.202555
1.44	48.609	-10.154		1	0.208891
1.46	48.609	-10.469		1	0.215372
1.48	48.609	-10.79		1	0.221975
1.5	48.609	-11.117		1	0.228703
1.52	48.609	-11.451		1	0.235574
1.54	48.609	-11.791		1	0.242568
1.56	48.609	-12.137		1	0.249686
1.58	48.609	-12.491		1	0.256969
1.6	48.609	-12.851		1	0.264375
1.62	48.609	-13.218		1	0.271925
1.64	48.609	-13.593		1	0.27964
1.66	48.609	-13.974		1	0.287478
1.68	48.609	-14.363		1	0.29548
1.7	48.609	-14.759		1	0.303627
1.72	48.609	-15.163		1	0.311938
1.74	48.609	-15.575		1	0.320414
1.76	48.609	-15.994		1	0.329034
1.78	48.609	-16.421		1	0.337818
1.8	48.609	-16.857		1	0.346788
1.82	48.609	-17.3		1	0.355901
1.84	48.609	-17.752		1	0.3652
1.86	48.609	-18.213		1	0.374684
1.88	48.609	-18.683		1	0.384353
1.9	48.609	-19.161		1	0.394186
1.92	48.609	-19.649		1	0.404226
1.94	48.609	-20.145		1	0.414429
1.96	48.609	-20.651		1	0.424839
1.98	48.609	-21.167		1	0.435454
2	48.609	-21.693		1	0.446275
2.02	48.609	-22.229		1	0.457302
2.04	48.609	-22.775		1	0.468535
2.06	48.609	-23.331		1	0.479973
2.08	48.609	-23.898		1	0.491637
2.1	48.609	-24.476		1	0.503528
2.12	48.609	-25.066		1	0.515666
2.14	48.609	-25.666		1	0.528009
2.16	48.609	-26.278		1	0.540599
2.18	48.609	-26.903		1	0.553457
2.2	48.609	-27.539		1	0.566541
2.22	48.609	-28.188		1	0.579893
2.24	48.609	-28.849		1	0.593491
2.26	48.609	-29.524		1	0.607377
2.28	48.609	-30.212		1	0.621531
2.3	48.609	-30.914		1	0.635973
2.32	48.609	-31.629		1	0.650682
2.34	48.609	-32.359		1	0.6657
2.36	48.609	-33.104		1	0.681026
2.38	48.609	-33.864		1	0.696661
2.4	48.609	-34.639		1	0.712605
2.42	48.609	-35.43		1	0.728877
2.44	48.609	-36.237		1	0.745479
2.46	48.609	-37.061		1	0.762431
2.48	48.609	-37.902		1	0.779732
2.5	48.609	-38.76		1	0.797383
2.52	48.609	-39.637		1	0.815425
2.54	48.609	-40.532		1	0.833837
2.56	48.609	-41.446		1	0.85264
2.58	48.609	-42.379		1	0.871834
2.6	48.609	-43.333		1	0.89146
2.62	48.609	-44.307		1	0.911498
2.64	48.609	-45.303		1	0.931988
2.66	48.609	-46.32		1	0.95291
2.68	48.609	-47.36		1	0.974305
2.7	48.609	-48.422		1	0.996153
2.72	48.609	-49.509		1	1.01852
2.74	48.609	-50.62		1	1.04137
2.76	48.609	-51.757		1	1.06476
2.78	48.609	-52.92		1	1.08869
2.8	48.609	-54.109		1	1.11315
2.82	48.609	-55.326		1	1.13818
2.84	48.609	-56.572		1	1.16382
2.86	48.609	-57.847		1	1.19005
2.88	48.609	-59.153		1	1.21691
2.9	48.609	-60.491		1	1.24444
2.92	48.609	-61.861		1	1.27262
2.94	48.609	-63.264		1	1.30149
2.96	48.609	-64.703		1	1.33109
2.98	48.609	-66.177		1	1.36141
3	48.609	-67.689		1	1.39252
3.02	48.609	-69.24		1	1.42443
3.04	48.609	-70.83		1	1.45714
3.06	48.609	-72.462		1	1.49071
3.08	48.609	-74.137		1	1.52517
3.1	48.609	-75.857		1	1.56055
3.12	48.609	-77.623		1	1.59689
3.14	48.609	-79.437		1	1.6342
3.16	48.609	-81.301		1	1.67255
3.18	48.609	-83.217		1	1.71197
3.2	48.609	-85.187		1	1.75249
3.22	48.609	-87.214		1	1.79419
3.24	48.609	-89.299		1	1.83709
3.26	48.609	-91.445		1	1.88124
3.28	48.609	-93.654		1	1.92668
3.3	48.609	-95.93		1	1.9735
3.32	48.609	-98.276		1	2.02177
3.34	48.609	-100.693		1	2.07149
3.36	48.609	-103.186		1	2.12278
3.38	48.609	-105.759		1	2.17571
3.4	48.609	-108.414		1	2.23033
3.42	48.609	-111.156		1	2.28674
3.44	48.609	-113.988		1	2.345
3.46	48.609	-116.916		1	2.40523
3.48	48.609	-119.944		1	2.46753
3.5	48.609	-123.077		1	2.53198
3.52	48.609	-126.321		1	2.59872
3.54	48.609	-129.681		1	2.66784
3.56	48.609	-133.163		1	2.73947
3.58	48.609	-136.774		1	2.81376
3.6	48.609	-140.522		1	2.89086
3.62	48.609	-144.413		1	2.97091
3.64	48.609	-148.457		1	3.05411
3.66	48.609	-152.661		1	3.14059
3.68	48.609	-157.037		1	3.23062
3.7	48.609	-161.593		1	3.32434
3.72	48.609	-166.342		1	3.42204
3.74	48.609	-171.296		1	3.52396
3.76	48.609	-176.467		1	3.63034
3.78	48.609	-181.87		1	3.74149
3.8	48.609	-187.522		1	3.85776
3.82	48.609	-193.439		1	3.97949
3.84	48.609	-199.64		1	4.10706
3.86	48.609	-206.146		1	4.2409
3.88	48.609	-212.98		1	4.38149
3.9	48.609	-220.167		1	4.52935
3.92	48.609	-227.734		1	4.68502
3.94	48.609	-235.712		1	4.84914
3.96	48.609	-244.136		1	5.02244
3.98	48.609	-253.043		1	5.20568
4	48.609	-262.476		1	5.39974
4.02	48.609	-272.483		1	5.60561
4.04	48.609	-283.116		1	5.82435
4.06	48.609	-294.437		1	6.05725
4.08	48.609	-306.513		1	6.30568
4.1	48.609	-319.423		1	6.57127
4.12	48.609	-333.255		1	6.85583
4.14	48.609	-348.112		1	7.16147
4.16	48.609	-364.111		1	7.49061
4.18	48.609	-381.388		1	7.84604
4.2	48.609	-400.103		1	8.23105
4.22	48.609	-420.441		1	8.64945
4.24	48.609	-442.623		1	9.10578
4.26	48.609	-466.91		1	9.60542
4.28	48.609	-493.617		1	10.1548
4.3	48.609	-523.122		1	10.7618
4.32	48.609	-555.889		1	11.4359
4.34	48.609	-592.49		1	12.1889
4.36	48.609	-633.636		1	13.0354
4.38	48.609	-680.231		1	13.9939
4.4	48.609	-733.429		1	15.0883
4.42	48.609	-794.742		1	16.3497
4.44	48.609	-866.175		1	17.8192
4.46	48.609	-950.458		1	19.5531
4.48	48.609	-1051		1	21.6215
4.5	48.609	-1174		1	24.1519
4.52	48.609	-1328		1	27.32
4.54	48.609	-1524		1	31.3522
4.56	48.609	-1785		1	36.7216
4.58	48.609	-2147		1	44.1688
4.6	48.609	-2685		1	55.2367
4.62	48.609	-3566		1	73.3609
4.64	48.609	-5277		1	108.56
4.66	48.609	-10020		1	206.135
4.68	48.609	-89360		1	1838.34
4.7	48.609	13110		1	-269.703
4.72	48.609	6150		1	-126.52
4.74	48.609	4035		1	-83.0093
4.76	48.609	3012		1	-61.9638
4.78	48.609	2409		1	-49.5587
4.8	48.609	2011		1	-41.3709
4.82	48.609	1729		1	-35.5695
4.84	48.609	1519		1	-31.2494
4.86	48.609	1356		1	-27.8961
4.88	48.609	1226		1	-25.2217
4.9	48.609	1120		1	-23.041
4.92	48.609	1032		1	-21.2306
4.94	48.609	957.659		1	-19.7013
4.96	48.609	893.979		1	-18.3912
4.98	48.609	838.869		1	-17.2575
5	48.609	790.709		1	-16.2667
5.02	48.609	748.263		1	-15.3935
5.04	48.609	710.572		1	-14.6181
5.06	48.609	676.88		1	-13.925
5.08	48.609	646.584		1	-13.3017
5.1	48.609	619.195		1	-12.7383
5.12	48.609	594.314		1	-12.2264
5.14	48.609	571.613		1	-11.7594
5.16	48.609	550.818		1	-11.3316
5.18	48.609	531.698		1	-10.9383
5.2	48.609	514.06		1	-10.5754
5.22	48.609	497.738		1	-10.2396
5.24	48.609	482.59		1	-9.928
5.26	48.609	468.494		1	-9.63801
5.28	48.609	455.345		1	-9.3675
5.3	48.609	443.051		1	-9.11459
5.32	48.609	431.531		1	-8.87759
5.34	48.609	420.714		1	-8.65506
5.36	48.609	410.538		1	-8.44572
5.38	48.609	400.949		1	-8.24845
5.4	48.609	391.896		1	-8.06221
5.42	48.609	383.337		1	-7.88613
5.44	48.609	375.232		1	-7.71939
5.46	48.609	367.546		1	-7.56127
5.48	48.609	360.247		1	-7.41112
5.5	48.609	353.308		1	-7.26837
5.52	48.609	346.702		1	-7.13247
5.54	48.609	340.406		1	-7.00294
5.56	48.609	334.399		1	-6.87936
5.58	48.609	328.662		1	-6.76134
5.6	48.609	323.176		1	-6.64848
5.62	48.609	317.926		1	-6.54048
5.64	48.609	312.897		1	-6.43702
5.66	48.609	308.075		1	-6.33782
5.68	48.609	303.449		1	-6.24265
5.7	48.609	299.005		1	-6.15123
5.72	48.609	294.735		1	-6.06338
5.74	48.609	290.627		1	-5.97887
5.76	48.609	286.674		1	-5.89755
5.78	48.609	282.865		1	-5.81919
5.8	48.609	279.195		1	-5.74369
5.82	48.609	275.655		1	-5.67086
5.84	48.609	272.238		1	-5.60057
5.86	48.609	268.939		1	-5.5327
5.88	48.609	265.751		1	-5.46712
5.9	48.609	262.669		1	-5.40371
5.92	48.609	259.688		1	-5.34239
5.94	48.609	256.803		1	-5.28303
5.96	48.609	254.009		1	-5.22555
5.98	48.609	251.303		1	-5.16989
6	48.609	248.68		1	-5.11593
[truncated: 10 more columns]

## Sheet: Data 6 7
		a = aa1.5		Cavity Depth = aa
Vib amplitude		Damping ratio =0.01			Damping ratio =0.005			Damping ratio =0.02
A0 x t/1000		peak freq	IL peak value		peak freq	IL peak value		peak freq
0.2		1.94	-14.04		2.34	-16.579		1.64	-11.086
0.3		2.16	-12.04		2.62	-14.404		1.8	-9.345
0.4		2.34	-10.566		2.84	-12.813		1.94	-8.034
0.6		2.62	-8.391		3.18	-10.511		2.16	-6.035
0.8		2.84	-6.8		3.45	-8.862		2.34	-4.557
1		3.03	-5.562		3.66	-7.529		2.49	-3.372
1.2		3.18	-4.499		3.84	-6.424		2.62	-2.384
1.4		3.32	-3.611		4	-5.521		2.74	-1.546
1.6		3.44	-2.82		4.14	-4.698		2.84	-0.794
1.8		3.56	-2.147		4.26	-3.96		2.94	-0.142
2		3.66	-1.515		4.37	-3.298		3.03	0.45
2.4		3.84	-0.41		4.56	-2.137		3.18	1.507
2.8		4	0.494		4.72	-1.14		3.32	2.396
		Vib amplitude = A0			a = aa1.5
		Cavity Depth = aa			Cavity Depth = aa 0.5			Cavity Depth = aa 2
Damping ratio		peak freq	IL peak value		peak freq	IL peak value		peak freq	IL peak value
0.0025		4.82	-20.506		6.19	-25.306		3.66	-15.256
0.005		3.9	-16.282		4.96	-20.826		3.02	-11.358
0.0075		3.44	-13.725		4.36	-18.196		2.69	-8.913
0.01		3.15	-11.881		3.98	-16.308		2.47	-7.054
0.0125		2.94	-10.409		3.71	-14.826		2.32	-5.632
0.015		2.78	-9.183		3.51	-13.628		2.2	-4.386
0.0175		2.66	-8.17		3.35	-12.59		2.11	-3.351
0.02		2.55	-7.218		3.22	-11.694		2.03	-2.401
0.0225		2.47	-6.428		3.1	-10.863		1.97	-1.584
0.025		2.39	-5.682		3	-10.114		1.91	-0.795
0.0275		2.33	-4.991		2.92	-9.46		1.86	-0.081
		Vib amplitude = A0			Damping ratio =0.01
		a = aa1			a = aa1.2			a = aa1.5
Cavity Depth/aa		peak freq	IL peak value		peak freq	IL peak value		peak freq	IL peak value
0.25		6.52	-15.729		5.79	-13.293		5	-10.264
0.35		5.78	-14.718		5.14	-12.249		4.44	-9.17
0.5		5.06	-13.583		4.52	-11.106		3.92	-8.012
0.75		4.31	-12.185		3.87	-9.71		3.38	-6.616
1		3.8	-11.051		3.44	-8.624		3.03	-5.562
1.25		3.42	-10.114		3.12	-7.651		2.76	-4.645
1.5		3.11	-9.226		2.86	-6.878		2.56	-3.869
1.75		2.85	-8.391		2.64	-6.088		2.38	-3.14
2		2.62	-7.566		2.46	-5.368		2.23	-2.442
2.25		2.44	-6.843		2.29	-4.624		2.1	-1.78
2.5		2.26	-6.047		2.14	-3.894		1.98	-1.11
2.75		2.12	-5.351		2.02	-3.244		1.88	-0.492
